# Supplementary material
Source: MDPI journal article supplement (https://www.mdpi.com/2673-8015/4/2/16)
Supplement: s1 [file s1]

# Supplementary Information: An Ab Initio Investigation of the Hydration of Antimony(III).

Cory C. Pye \* and Champika Mahesh Gunasekara

**Table S1: Total Energies of Aquaantimony(III) Species** (bold indicates a minimum energy structure)

|                                                         | HF/CEP-4G (6d)     | HF/CEP-31G*(6d)    | HF/CEP-121G* (6d)  |
|---------------------------------------------------------|--------------------|--------------------|--------------------|
| $\text{H}_3\text{O}^+ D_{3h}$                           | <b>-17.0486214</b> | -17.1252753        | -17.1290991        |
| $\text{H}_3\text{O}^+ C_{3v}$                           | n/a                | <b>-17.1275085</b> | <b>-17.1323143</b> |
| $\text{Sb}^{3+} K_h$                                    | <b>-3.4762496</b>  | <b>-3.4762496</b>  | <b>-3.4762496</b>  |
| $\text{SbOH}^{2+} D_{\infty h}$                         | <b>-20.6563325</b> | <b>-20.7103708</b> | <b>-20.7141462</b> |
| $\text{Sb}(\text{H}_2\text{O})^{3+} C_{2v}$             | <b>-20.4826249</b> | <b>-20.5417161</b> | <b>-20.5458060</b> |
| $\text{SbOH}(\text{H}_2\text{O})^{2+} C_s$              | <b>-37.5499634</b> | <b>-37.6753198</b> | <b>-37.6836438</b> |
| $\text{Sb}(\text{H}_2\text{O})_2^{3+} D_{2d}$           | -37.3751683        | -37.5219139        | -37.5294757        |
| $\text{Sb}(\text{H}_2\text{O})_2^{3+} C_s$              | -37.4443460        | -37.5663403        | -37.5749714        |
| $\text{Sb}(\text{H}_2\text{O})_2^{3+} C_2$              | <b>-37.4462008</b> | <b>-37.5674707</b> | <b>-37.5758881</b> |
| $\text{SbOH}(\text{H}_2\text{O})_2^{2+} C_s$            | <b>-54.4242920</b> | <b>-54.6198097</b> | <b>-54.6322133</b> |
| $\text{Sb}(\text{H}_2\text{O})_3^{3+} D_{3h} \#1$       | -54.2844838        | -54.5009855        | -54.5129646        |
| $\text{Sb}(\text{H}_2\text{O})_3^{3+} D_{3h} \#2$       | -54.2917744        | -54.5041550        | -54.5157755        |
| $\text{Sb}(\text{H}_2\text{O})_3^{3+} D_3$              | $D_{3h} \#2$       | -54.5047843        | -54.5166096        |
| $\text{Sb}(\text{H}_2\text{O})_3^{3+} C_{3v} \#1$       | -54.3746885        | -54.5583507        | -54.5711588        |
| $\text{Sb}(\text{H}_2\text{O})_3^{3+} C_{3v} \#2$       | -54.3662263        | -54.5523839        | -54.5653978        |
| $\text{Sb}(\text{H}_2\text{O})_3^{3+} C_3$              | <b>-54.3768748</b> | <b>-54.5630440</b> | <b>-54.5764300</b> |
| $\text{Sb}(\text{H}_2\text{O})_3^{3+} [2+1] C_{2v}$     | -54.3257103        | -54.5154795        | -54.5272602        |
| $\text{SbOH}(\text{H}_2\text{O})_3^{2+} C_s$            | <b>-71.2585117</b> | <b>-71.5331581</b> | <b>-71.5495815</b> |
| $\text{Sb}(\text{H}_2\text{O})_4^{2+} D_{2d} \#1$       | -71.1803759        | -71.4637620        | -71.4795455        |
| $\text{Sb}(\text{H}_2\text{O})_4^{2+} D_{2d} \#2$       | -71.1801967        | -71.4633302        | -71.4791900        |
| $\text{Sb}(\text{H}_2\text{O})_4^{2+} D_2$              | $D_{2d} \#1$       | $D_{2d} \#1$       | $D_{2d} \#1$       |
| $\text{Sb}(\text{H}_2\text{O})_4^{2+} S_4$              | -71.1812395        | -71.4646732        | -71.4807505        |
| $\text{Sb}(\text{H}_2\text{O})_4^{2+} C_{2v} \#1$       | -71.2344609        | -71.5016110        | -71.5185979        |
| $\text{Sb}(\text{H}_2\text{O})_4^{2+} C_{2v} \#2$       | -71.2387458        | -71.5016485        | -71.5186063        |
| $\text{Sb}(\text{H}_2\text{O})_4^{2+} C_{2v} \#3$       | -71.2444081        | -71.5092625        | -71.5263612        |
| $\text{Sb}(\text{H}_2\text{O})_4^{3+} C_2$              | <b>-71.2444568</b> | <b>-71.5092710</b> | <b>-71.5264308</b> |
| $\text{Sb}(\text{H}_2\text{O})_4^{3+} [3+1] C_s \#1$    | -71.2352972        | -71.4934221        | -71.5103093        |
| $\text{Sb}(\text{H}_2\text{O})_4^{3+} [3+1] C_s \#2$    | -71.2375140        | -71.4950052        | -71.5116544        |
| $\text{SbOH}(\text{H}_2\text{O})_4^{2+} C_s \#1$        | -88.0803085        | -88.4345760        | -88.4548117        |
| $\text{SbOH}(\text{H}_2\text{O})_4^{2+} C_s \#2$        | -88.0800451        | <b>-88.4353704</b> | <b>-88.4558451</b> |
| $\text{Sb}(\text{H}_2\text{O})_5^{3+} C_{2v} \#1$       | <b>-88.0941515</b> | <b>-88.4425395</b> | <b>-88.4637426</b> |
| $\text{Sb}(\text{H}_2\text{O})_5^{3+} C_{2v} \#2$       | -88.0795728        | -88.4272295        | -88.4477447        |
| $\text{Sb}(\text{H}_2\text{O})_5^{3+} C_{2v} \#3$       | -88.0867086        | -88.4301978        | -88.4507269        |
| $\text{Sb}(\text{H}_2\text{O})_5^{3+} C_{2v} \#4$       | -88.0824944        | -88.4282714        | -88.4487756        |
| $\text{Sb}(\text{H}_2\text{O})_5^{3+} [4+1] C_{2v} \#1$ | -88.0914865        | -88.4296413        | <b>-88.4502480</b> |
| $\text{Sb}(\text{H}_2\text{O})_5^{3+} [4+1] C_{2v} \#2$ | -88.0886469        | -88.4276694        | -88.4485326        |
| $\text{Sb}(\text{H}_2\text{O})_6^{3+} T_h$              | -104.8956760       | -105.3379058       | -105.3623182       |

|                                                      |                     |                                                                 |                                                                 |
|------------------------------------------------------|---------------------|-----------------------------------------------------------------|-----------------------------------------------------------------|
| $\text{Sb}(\text{H}_2\text{O})_6^{3+} C_3$           | <b>-104.9219182</b> | <b>-105.3517838</b>                                             | <b>-105.3764974</b>                                             |
| $\text{Sb}(\text{H}_2\text{O})_6^{3+} [5+1] C_s \#1$ | -104.9490286        | $\text{SbOH}(\text{H}_2\text{O})_4^{2+} + \text{H}_3\text{O}^+$ | $\text{SbOH}(\text{H}_2\text{O})_4^{2+} + \text{H}_3\text{O}^+$ |
| $\text{Sb}(\text{H}_2\text{O})_6^{3+} [5+1] C_s \#2$ | -104.9518421        | $\text{SbOH}(\text{H}_2\text{O})_4^{2+} + \text{H}_3\text{O}^+$ | <b>-105.3833131</b>                                             |

|                                                    | HF/CEP-4G (6d)  | HF/CEP-31G*(6d) | HF/CEP-121G* (6d)  |
|----------------------------------------------------|-----------------|-----------------|--------------------|
| $\text{Sb}(\text{H}_2\text{O})_7^{3+} C_{2v} \#1$  | [5+2]           | -122.2475806    | [5+2]              |
| $\text{Sb}(\text{H}_2\text{O})_7^{3+} C_{2v} \#2$  | [5+2]           | -122.2375976    | -122.2659968       |
| $\text{Sb}(\text{H}_2\text{O})_7^{3+} C_{2v} \#3$  | [5+2]           | -122.2353167    | -122.2630926       |
| $\text{Sb}(\text{H}_2\text{O})_7^{3+} C_{2v} \#4$  | [5+2]           | [5+2]           | [5+2]              |
| $\text{Sb}(\text{H}_2\text{O})_7^{3+} C_{2v} \#5$  | -121.7086953    | -122.2206201    | -122.2476558       |
| $\text{Sb}(\text{H}_2\text{O})_7^{3+} C_{2v} \#6$  | -121.7130477    | -122.2282238    | -122.2554739       |
| $\text{Sb}(\text{H}_2\text{O})_7^{3+} C_{2v} \#7$  | -121.7095213    | -122.2205447    | -122.2475929       |
| $\text{Sb}(\text{H}_2\text{O})_7^{3+} C_{2v} \#8$  | -121.7236779    | -122.2374469    | -122.2656049       |
| $\text{Sb}(\text{H}_2\text{O})_7^{3+} C_{2v} \#9$  | [5+2]           | -122.2370848    | -122.2649705       |
| $\text{Sb}(\text{H}_2\text{O})_7^{3+} C_{2v} \#10$ | [5+2]           | -122.2243392    | -122.2514131       |
| $\text{Sb}(\text{H}_2\text{O})_7^{3+} C_{2v} \#11$ | -121.7213951    | -122.2323546    | -122.2600577       |
| $\text{Sb}(\text{H}_2\text{O})_7^{3+} C_{2v} \#12$ | [5+2]           | -122.2246965    | -122.2519432       |
| $\text{Sb}(\text{H}_2\text{O})_7^{3+} C_{2v} \#13$ | -121.7220690    | -122.2340395    | -122.2619568       |
| $\text{Sb}(\text{H}_2\text{O})_7^{3+} C_{2v} \#14$ | -121.7212963    | -122.2353536    | -122.2630145       |
| $\text{Sb}(\text{H}_2\text{O})_7^{3+} C_{2v} \#15$ | [4+3]           | -122.2370808    | -122.2652176       |
| $\text{Sb}(\text{H}_2\text{O})_7^{3+} C_{2v} \#16$ | -121.7245293    | -122.2424034    | -122.2701447       |
| $\text{Sb}(\text{H}_2\text{O})_7^{3+} C_2 \#1$     | n/a             | $C_2 \#16$      | n/a                |
| $\text{Sb}(\text{H}_2\text{O})_7^{3+} C_2 \#2$     | n/a             | $C_2 \#16$      | $C_2 \#16$         |
| $\text{Sb}(\text{H}_2\text{O})_7^{3+} C_2 \#3$     | n/a             | $C_2 \#11$      | $C_2 \#11$         |
| $\text{Sb}(\text{H}_2\text{O})_7^{3+} C_2 \#5$     | [5+2]           | $C_2 \#16$      | $C_2 \#16$         |
| $\text{Sb}(\text{H}_2\text{O})_7^{3+} C_2 \#6$     | [5+2]           | -122.2453026    | [5+2] -122.2833765 |
| $\text{Sb}(\text{H}_2\text{O})_7^{3+} C_2 \#7$     | [5+2]           | $C_2 \#16$      | $C_2 \#16$         |
| $\text{Sb}(\text{H}_2\text{O})_7^{3+} C_2 \#8$     | [5+2]           | $C_2 \#16$      | $C_2 \#16$         |
| $\text{Sb}(\text{H}_2\text{O})_7^{3+} C_2 \#9$     | n/a             | $C_2 \#16$      | $C_2 \#16$         |
| $\text{Sb}(\text{H}_2\text{O})_7^{3+} C_2 \#10$    | n/a             | $C_2 \#16$      | $C_2 \#16$         |
| $\text{Sb}(\text{H}_2\text{O})_7^{3+} C_2 \#11$    | -121.7264112    | -122.2418089    | -122.2697162       |
| $\text{Sb}(\text{H}_2\text{O})_7^{3+} C_2 \#12$    | n/a             | $C_2 \#16$      | $C_2 \#16$         |
| $\text{Sb}(\text{H}_2\text{O})_7^{3+} C_2 \#13$    | proton transfer | $C_2 \#16$      | -122.2700461       |
| $\text{Sb}(\text{H}_2\text{O})_7^{3+} C_2 \#14$    | [4+3]           | $C_2 \#16$      | $C_2 \#13$         |
| $\text{Sb}(\text{H}_2\text{O})_7^{3+} C_2 \#15$    | n/a             | $C_2 \#16$      | $C_2 \#13$         |
| $\text{Sb}(\text{H}_2\text{O})_7^{3+} C_2 \#16$    | [5+2]           | -122.2484785    | -122.2769974       |

|                                                                         | HF/CEP-4G (6d)                                                    | HF/CEP-31G*(6d)                 | HF/CEP-121G* (6d)               |
|-------------------------------------------------------------------------|-------------------------------------------------------------------|---------------------------------|---------------------------------|
| Sb(H <sub>2</sub> O) <sub>7</sub> <sup>3+</sup> C <sub>s</sub> #1       | n/a                                                               | C <sub>s</sub> #5               | n/a                             |
| Sb(H <sub>2</sub> O) <sub>7</sub> <sup>3+</sup> C <sub>s</sub> #2       | n/a                                                               | C <sub>s</sub> #7               | -122.2675004                    |
| Sb(H <sub>2</sub> O) <sub>7</sub> <sup>3+</sup> C <sub>s</sub> #3       | n/a                                                               | [6+1]                           | [6+1]                           |
| Sb(H <sub>2</sub> O) <sub>7</sub> <sup>3+</sup> C <sub>s</sub> #4       | n/a                                                               | C <sub>2v</sub> #1              | [5+2]                           |
| Sb(H <sub>2</sub> O) <sub>7</sub> <sup>3+</sup> C <sub>s</sub> #5       | [5+2]                                                             | -122.2504088                    | -122.2789821                    |
| Sb(H <sub>2</sub> O) <sub>7</sub> <sup>3+</sup> C <sub>s</sub> #6       | C <sub>2v</sub> #7 -121.7117839                                   | C <sub>2v</sub> #7 -122.2222878 | C <sub>2v</sub> #7 -122.2500144 |
| Sb(H <sub>2</sub> O) <sub>7</sub> <sup>3+</sup> C <sub>s</sub> #7       | [5+2]                                                             | -122.2415134                    | -122.2694821                    |
| Sb(H <sub>2</sub> O) <sub>7</sub> <sup>3+</sup> C <sub>s</sub> #8       | [6+1], then H <sup>+</sup> xfer.                                  | -122.2374944                    | -122.2656758                    |
| Sb(H <sub>2</sub> O) <sub>7</sub> <sup>3+</sup> C <sub>s</sub> #9       | C <sub>s</sub> #6                                                 | C <sub>s</sub> #6               | C <sub>s</sub> #6               |
| Sb(H <sub>2</sub> O) <sub>7</sub> <sup>3+</sup> C <sub>s</sub> #10      | -121.7312127                                                      | -122.2381134                    | -122.2657843                    |
| Sb(H <sub>2</sub> O) <sub>7</sub> <sup>3+</sup> C <sub>s</sub> #11      | [5+2]                                                             | C <sub>s</sub> #26              | C <sub>s</sub> #26              |
| Sb(H <sub>2</sub> O) <sub>7</sub> <sup>3+</sup> C <sub>s</sub> #12      | SbOHAq <sub>5</sub> <sup>2+</sup> + H <sub>3</sub> O <sup>+</sup> | C <sub>s</sub> #8               | C <sub>s</sub> #8               |
| Sb(H <sub>2</sub> O) <sub>7</sub> <sup>3+</sup> C <sub>s</sub> #13      | n/a                                                               | C <sub>s</sub> #5               | C <sub>s</sub> #5               |
| Sb(H <sub>2</sub> O) <sub>7</sub> <sup>3+</sup> C <sub>s</sub> #14      | n/a                                                               | C <sub>s</sub> #7               | -122.2677631                    |
| Sb(H <sub>2</sub> O) <sub>7</sub> <sup>3+</sup> C <sub>s</sub> #15      | n/a                                                               | C <sub>2v</sub> #12             | C <sub>2v</sub> #12             |
| Sb(H <sub>2</sub> O) <sub>7</sub> <sup>3+</sup> C <sub>s</sub> #16      | [5+2]                                                             | C <sub>s</sub> #24              | C <sub>s</sub> #24              |
| Sb(H <sub>2</sub> O) <sub>7</sub> <sup>3+</sup> C <sub>s</sub> #17      | [5+2]                                                             | -122.2348951                    | -122.2626663                    |
| Sb(H <sub>2</sub> O) <sub>7</sub> <sup>3+</sup> C <sub>s</sub> #18      | n/a                                                               | C <sub>s</sub> #26              | C <sub>s</sub> #26              |
| Sb(H <sub>2</sub> O) <sub>7</sub> <sup>3+</sup> C <sub>s</sub> #20      | -121.7349682                                                      | -122.2462497                    | -122.2747963                    |
| Sb(H <sub>2</sub> O) <sub>7</sub> <sup>3+</sup> C <sub>s</sub> #21      | proton transfer                                                   | -122.2388738                    | [6+1] -122.2686634              |
| Sb(H <sub>2</sub> O) <sub>7</sub> <sup>3+</sup> C <sub>s</sub> #22      | -121.7284199                                                      | C <sub>s</sub> #7               | [6+1] C <sub>s</sub> #7         |
| Sb(H <sub>2</sub> O) <sub>7</sub> <sup>3+</sup> C <sub>s</sub> #23      | [5+2], proton xfer                                                | -122.2445392                    | -122.2729014                    |
| Sb(H <sub>2</sub> O) <sub>7</sub> <sup>3+</sup> C <sub>s</sub> #24      | n/a                                                               | -122.2416956                    | -122.2697563                    |
| Sb(H <sub>2</sub> O) <sub>7</sub> <sup>3+</sup> C <sub>s</sub> #25      | n/a                                                               | C <sub>s</sub> #21              | [6+1] C <sub>s</sub> #21        |
| Sb(H <sub>2</sub> O) <sub>7</sub> <sup>3+</sup> C <sub>s</sub> #26      | [5+2]                                                             | -122.2467913                    | -122.2748006                    |
| Sb(H <sub>2</sub> O) <sub>7</sub> <sup>3+</sup> C <sub>s</sub> #27      | [5+2]                                                             | C <sub>s</sub> #23              | C <sub>s</sub> #23              |
| Sb(H <sub>2</sub> O) <sub>7</sub> <sup>3+</sup> C <sub>s</sub> #3 [6+1] |                                                                   | -122.2536627                    |                                 |
| Sb(H <sub>2</sub> O) <sub>7</sub> <sup>3+</sup> C <sub>2v</sub> [5+2]   | <b>-121.7631138</b>                                               | <b>-122.2556125</b>             | <b>-122.2832656</b>             |
| Sb(H <sub>2</sub> O) <sub>7</sub> <sup>3+</sup> C <sub>1</sub> #2       | n/a                                                               | C <sub>1</sub> #3               | n/a                             |
| Sb(H <sub>2</sub> O) <sub>7</sub> <sup>3+</sup> C <sub>1</sub> #3       | [5+2]                                                             | <b>-122.2509160</b>             | <b>-122.2793177</b>             |
| Sb(H <sub>2</sub> O) <sub>7</sub> <sup>3+</sup> C <sub>1</sub> #4       | n/a                                                               | n/a                             | C <sub>1</sub> #3               |
| Sb(H <sub>2</sub> O) <sub>7</sub> <sup>3+</sup> C <sub>1</sub> #5       | n/a                                                               | C <sub>1</sub> #3               | <b>-122.2790016</b>             |
| Sb(H <sub>2</sub> O) <sub>7</sub> <sup>3+</sup> C <sub>1</sub> #6       | n/a                                                               | n/a                             | C <sub>1</sub> #5               |
| Sb(H <sub>2</sub> O) <sub>7</sub> <sup>3+</sup> C <sub>1</sub> #8       | n/a                                                               | C <sub>1</sub> #3               | C <sub>1</sub> #5               |
| Sb(H <sub>2</sub> O) <sub>7</sub> <sup>3+</sup> C <sub>1</sub> #9       | [5+2]                                                             | C <sub>1</sub> #3               | C <sub>1</sub> #5               |
| Sb(H <sub>2</sub> O) <sub>7</sub> <sup>3+</sup> C <sub>1</sub> #10      | n/a                                                               | <b>-122.2500300</b>             | C <sub>1</sub> #3               |
| Sb(H <sub>2</sub> O) <sub>7</sub> <sup>3+</sup> C <sub>1</sub> #11      | n/a                                                               | C <sub>1</sub> #3               | C <sub>1</sub> #3               |
| Sb(H <sub>2</sub> O) <sub>7</sub> <sup>3+</sup> C <sub>1</sub> #12      | [5+2]                                                             | C <sub>1</sub> #3               | C <sub>1</sub> #3               |
| Sb(H <sub>2</sub> O) <sub>7</sub> <sup>3+</sup> C <sub>1</sub> #14      | n/a                                                               | n/a                             | C <sub>1</sub> #3               |
| Sb(H <sub>2</sub> O) <sub>7</sub> <sup>3+</sup> C <sub>1</sub> #15      | n/a                                                               | C <sub>1</sub> #3               | C <sub>1</sub> #3               |
| Sb(H <sub>2</sub> O) <sub>7</sub> <sup>3+</sup> C <sub>1</sub> #16      | [4+3]                                                             | C <sub>1</sub> #3               | C <sub>1</sub> #3               |
| Sb(H <sub>2</sub> O) <sub>7</sub> <sup>3+</sup> C <sub>1</sub> #17      | n/a                                                               | C <sub>1</sub> #3               | <b>[6+1] -122.2885896</b>       |
| Sb(H <sub>2</sub> O) <sub>7</sub> <sup>3+</sup> C <sub>1</sub> #18      | [5+2]                                                             | n/a                             | n/a                             |
| Sb(H <sub>2</sub> O) <sub>7</sub> <sup>3+</sup> C <sub>1</sub> #19      | n/a                                                               | C <sub>1</sub> #3               | C <sub>1</sub> #3               |

|                                                  |     |          |          |
|--------------------------------------------------|-----|----------|----------|
| $\text{Sb}(\text{H}_2\text{O})_7^{3+}$ $C_1$ #20 | n/a | $C_1$ #3 | $C_1$ #5 |
| $\text{Sb}(\text{H}_2\text{O})_7^{3+}$ $C_1$ #21 | n/a | $C_1$ #3 | $C_1$ #3 |

|                                                    | HF/CEP-4G (6d)     | HF/CEP-31G*(6d)     | HF/CEP-121G* (6d)   |
|----------------------------------------------------|--------------------|---------------------|---------------------|
| $\text{Sb}(\text{H}_2\text{O})_8^{3+}$ $D_{4h}$ #1 | -138.4997016       | -139.0947187        | -139.1241154        |
| $\text{Sb}(\text{H}_2\text{O})_8^{3+}$ $D_{4h}$ #2 | -138.4999385       | -139.0951166        | -139.1246325        |
| $\text{Sb}(\text{H}_2\text{O})_8^{3+}$ $D_{4d}$ #1 | -138.5271959       | -139.1269536        | -139.1569001        |
| $\text{Sb}(\text{H}_2\text{O})_8^{3+}$ $D_{4d}$ #2 | -138.5248620       | -139.1254032        | -139.1550032        |
| $\text{Sb}(\text{H}_2\text{O})_8^{3+}$ $S_8$ #1    | -138.5419223       | <b>-139.1480934</b> | <b>-139.1786542</b> |
| $\text{Sb}(\text{H}_2\text{O})_8^{3+}$ $S_8$ #2    | $S_8$ #1           | $S_8$ #1            | $S_8$ #1            |
| $\text{Sb}(\text{H}_2\text{O})_8^{3+}$ $D_4$ #1    | -138.5340490       | -139.1380305        | -139.1688739        |
| $\text{Sb}(\text{H}_2\text{O})_8^{3+}$ $D_4$ #2    | $D_4$ #1           | $D_4$ #1            | $D_4$ #1            |
| $\text{Sb}(\text{H}_2\text{O})_8^{3+}$ $D_4$ #3    | $D_4$ #1           | $D_4$ #1            | $D_4$ #1            |
| $\text{Sb}(\text{H}_2\text{O})_8^{3+}$ $D_4$ #4    | $D_4$ #1           | $D_4$ #1            | $D_4$ #1            |
| $\text{Sb}(\text{H}_2\text{O})_8^{3+}$ $C_{4v}$ #1 | -138.5346266       | n/a                 | n/a                 |
| $\text{Sb}(\text{H}_2\text{O})_8^{3+}$ $C_{4v}$ #2 | -138.5273438       | n/a                 | n/a                 |
| $\text{Sb}(\text{H}_2\text{O})_8^{3+}$ $C_{4v}$ #3 | [4+4] -138.6015318 | n/a                 | n/a                 |
| $\text{Sb}(\text{H}_2\text{O})_8^{3+}$ $C_{4v}$ #4 | -138.5000098       | n/a                 | n/a                 |
| $\text{Sb}(\text{H}_2\text{O})_8^{3+}$ $C_{4h}$ #1 | -138.5222261       | -139.1261677        | -139.1571780        |
| $\text{Sb}(\text{H}_2\text{O})_8^{3+}$ $C_{4h}$ #2 | $C_{4h}$ #1        | $C_{4h}$ #1         | $C_{4h}$ #1         |
| $\text{Sb}(\text{H}_2\text{O})_8^{3+}$ $D_{2h}$ #1 | $D_{4h}$ #2        | $D_{4h}$ #2         | $D_{4h}$ #2         |
| $\text{Sb}(\text{H}_2\text{O})_8^{3+}$ $D_{2d}$ #1 | -138.5149496       | -139.1159871        | -139.1465949        |
| $\text{Sb}(\text{H}_2\text{O})_8^{3+}$ $D_{2d}$ #2 | -138.5204309       | -139.1195411        | -139.1494837        |
| $\text{Sb}(\text{H}_2\text{O})_8^{3+}$ $D_{2d}$ #3 | $D_{2d}$ #1        | $D_{2d}$ #1         | $D_{2d}$ #1         |
| $\text{Sb}(\text{H}_2\text{O})_8^{3+}$ $D_{2d}$ #4 | -138.5209727       | -139.1190224        | -139.1492629        |
| $\text{Sb}(\text{H}_2\text{O})_8^{3+}$ $D_{2d}$ #5 | -138.5336386       | -139.1378483        | -139.1687129        |
| $\text{Sb}(\text{H}_2\text{O})_8^{3+}$ $C_4$ #1    | [4+4] -138.6148825 | $S_8$ #1            | $S_8$ #1            |
| $\text{Sb}(\text{H}_2\text{O})_8^{3+}$ $C_4$ #2    | $C_4$ #1           | n/a                 | n/a                 |
| $\text{Sb}(\text{H}_2\text{O})_8^{3+}$ $C_4$ #3    | $C_4$ #1           | n/a                 | n/a                 |
| $\text{Sb}(\text{H}_2\text{O})_8^{3+}$ $C_4$ #4    | $C_4$ #1           | n/a                 | n/a                 |
| $\text{Sb}(\text{H}_2\text{O})_8^{3+}$ $S_4$ #1    | $D_{2d}$ #5        | $D_{2d}$ #5         | $D_{2d}$ #5         |
| $\text{Sb}(\text{H}_2\text{O})_8^{3+}$ $S_4$ #2    | -138.5343663       | -139.1377112        | -139.1684921        |
| $\text{Sb}(\text{H}_2\text{O})_8^{3+}$ $S_4$ #3    | $S_4$ #2           | $S_4$ #2            | $S_4$ #2            |
| $\text{Sb}(\text{H}_2\text{O})_8^{3+}$ $S_4$ #4    | $S_4$ #2           | $S_4$ #2            | $S_4$ #2            |
| $\text{Sb}(\text{H}_2\text{O})_8^{3+}$ $D_2$ #1    | -138.5380416       | -139.1418500        | -139.1723727        |
| $\text{Sb}(\text{H}_2\text{O})_8^{3+}$ $D_2$ #2    | $D_2$ #1           | $D_2$ #1            | $D_2$ #1            |
| $\text{Sb}(\text{H}_2\text{O})_8^{3+}$ $D_2$ #3    | $D_2$ #1           | $D_2$ #1            | $D_2$ #1            |
| $\text{Sb}(\text{H}_2\text{O})_8^{3+}$ $D_2$ #4    | $D_2$ #1           | $D_2$ #1            | $D_2$ #1            |
| $\text{Sb}(\text{H}_2\text{O})_8^{3+}$ $D_2$ #5    | $D_2$ #1           | $D_2$ #1            | $D_2$ #1            |
| $\text{Sb}(\text{H}_2\text{O})_8^{3+}$ $C_{2v}$ #1 | [4+4] -138.6052835 | n/a                 | n/a                 |
| $\text{Sb}(\text{H}_2\text{O})_8^{3+}$ $C_{2v}$ #2 | [6+2] -138.5621521 | n/a                 | n/a                 |
| $\text{Sb}(\text{H}_2\text{O})_8^{3+}$ $C_{2v}$ #3 | -138.5222450       | n/a                 | n/a                 |
| $\text{Sb}(\text{H}_2\text{O})_8^{3+}$ $C_{2v}$ #4 | [6+2] -138.5715331 | n/a                 | n/a                 |

|                                                   |                                                                                               |           |           |
|---------------------------------------------------|-----------------------------------------------------------------------------------------------|-----------|-----------|
| $\text{Sb}(\text{H}_2\text{O})_8^{3+} C_{2v} \#5$ | -138.5388209                                                                                  | n/a       | n/a       |
| $\text{Sb}(\text{H}_2\text{O})_8^{3+} C_{2v} \#6$ | -138.5275564                                                                                  | n/a       | n/a       |
| $\text{Sb}(\text{H}_2\text{O})_8^{3+} C_{2v} \#7$ | -138.5450388                                                                                  | n/a       | n/a       |
| $\text{Sb}(\text{H}_2\text{O})_8^{3+} C_{2v} \#8$ | $C_{2v} \#3$                                                                                  | n/a       | n/a       |
| $\text{Sb}(\text{H}_2\text{O})_8^{3+} C_{2v} \#9$ | $C_{2v} \#1$                                                                                  | n/a       | n/a       |
| $\text{Sb}(\text{H}_2\text{O})_8^{3+} C_2 \#1$    | [4+4] <b>-138.6227814</b>                                                                     | $D_2 \#1$ | $D_2 \#1$ |
| $\text{Sb}(\text{H}_2\text{O})_8^{3+} C_2 \#2$    | $C_2 \#1$                                                                                     | $S_8 \#1$ | $S_8 \#1$ |
|                                                   |                                                                                               |           |           |
| $\text{Sb}(\text{H}_2\text{O})_8^{3+} D_{2h} \#1$ | -138.5214224                                                                                  | n/a       | n/a       |
| $\text{Sb}(\text{H}_2\text{O})_8^{3+} C_{2h} \#2$ | -138.5216694                                                                                  | n/a       | n/a       |
| $\text{Sb}(\text{H}_2\text{O})_8^{3+} C_{2v} \#1$ | [6+2] -138.5242148                                                                            | n/a       | n/a       |
| $\text{Sb}(\text{H}_2\text{O})_8^{3+} C_{2v} \#3$ | -138.5664317                                                                                  | n/a       | n/a       |
| $\text{Sb}(\text{H}_2\text{O})_8^{3+} C_{2v} \#4$ | -138.5220627                                                                                  | n/a       | n/a       |
| $\text{Sb}(\text{H}_2\text{O})_8^{3+} C_{2v} \#6$ | [4+4] -138.6122626                                                                            | n/a       | n/a       |
| $\text{Sb}(\text{H}_2\text{O})_8^{3+} C_s \#1$    | [4+4] -138.5934634                                                                            | n/a       | n/a       |
| $\text{Sb}(\text{H}_2\text{O})_8^{3+} C_s \#2$    | [5+3] -138.5845022                                                                            | n/a       | n/a       |
| $\text{Sb}(\text{H}_2\text{O})_8^{3+} C_s \#3$    | [4+4] -138.6071528                                                                            | n/a       | n/a       |
| $\text{Sb}(\text{H}_2\text{O})_8^{3+} C_1 \#1$    | $\text{Sb}(\text{H}_2\text{O})_3(\text{OH})_2^+ + 2\text{H}_3\text{O}^+ + \text{H}_2\text{O}$ |           | n/a       |

|                                                      | HF/CEP-4G (6d)     | HF/CEP-31G*(6d)     | HF/CEP-121G* (6d)   |
|------------------------------------------------------|--------------------|---------------------|---------------------|
| $\text{Sb}(\text{H}_2\text{O})_9^{3+} D_{3h} \#1$    | -155.3341515       | -156.0150549        | -156.0486198        |
| $\text{Sb}(\text{H}_2\text{O})_9^{3+} D_{3h} \#2$    | -155.3128517       | -155.9848206        | -156.0173720        |
| $\text{Sb}(\text{H}_2\text{O})_9^{3+} D_{3h} \#3$    | -155.3188315       | -155.9937787        | -156.0280233        |
| $\text{Sb}(\text{H}_2\text{O})_9^{3+} D_{3h} \#4$    | -155.3384285       | -156.0215053        | -156.0556499        |
| $\text{Sb}(\text{H}_2\text{O})_9^{3+} D_3 \#1$       | -155.3461587       | -156.0330630        | -156.0673199        |
| $\text{Sb}(\text{H}_2\text{O})_9^{3+} D_3 \#2$       | $D_3 \#1$          | $D_3 \#1$           | $D_3 \#1$           |
| $\text{Sb}(\text{H}_2\text{O})_9^{3+} D_3 \#3$       | $D_3 \#1$          | $D_3 \#1$           | $D_3 \#1$           |
| $\text{Sb}(\text{H}_2\text{O})_9^{3+} D_3 \#4$       | $D_3 \#1$          | $D_3 \#1$           | $D_3 \#1$           |
| $\text{Sb}(\text{H}_2\text{O})_9^{3+} C_{3h} \#1$    | -155.3399432       | -156.0248754        | -156.0590968        |
| $\text{Sb}(\text{H}_2\text{O})_9^{3+} C_{3h} \#2$    | -155.3405223       | -156.0241243        | -156.0580805        |
| $\text{Sb}(\text{H}_2\text{O})_9^{3+} C_{3h} \#3$    | $C_{3h} \#1$       | $C_{3h} \#1$        | $C_{3h} \#1$        |
| $\text{Sb}(\text{H}_2\text{O})_9^{3+} C_{3h} \#4$    | $C_{3h} \#2$       | $C_{3h} \#2$        | $C_{3h} \#2$        |
| $\text{Sb}(\text{H}_2\text{O})_9^{3+} C_{3v} \#1$    | -155.3411975       | n/a                 | n/a                 |
| $\text{Sb}(\text{H}_2\text{O})_9^{3+} C_{3v} \#2$    | [6+3] -155.4069179 | [6+3] -156.0325104  | [6+3] -156.0661119  |
| $\text{Sb}(\text{H}_2\text{O})_9^{3+} C_{3v} \#3$    | [6+3] -155.3574872 | [6+3] -156.0206759  | [6+3] -156.0567885  |
| $\text{Sb}(\text{H}_2\text{O})_9^{3+} C_{3v} \#4$    | -155.3429399       | n/a                 | n/a                 |
| $\text{Sb}(\text{H}_2\text{O})_9^{3+} C_3 \#1$       | [6+3]              | n/a                 | $D_3 \#1$           |
| $\text{Sb}(\text{H}_2\text{O})_9^{3+} C_3 \#2$       | [6+3]              | $D_3 \#1$           | [6+3]               |
| $\text{Sb}(\text{H}_2\text{O})_9^{3+} C_3 \#3$       | [6+3]              | $D_3 \#1$           | $D_3 \#1$           |
| $\text{Sb}(\text{H}_2\text{O})_9^{3+} C_3 \#4$       | [6+3]              | n/a                 | n/a                 |
| $\text{Sb}(\text{H}_2\text{O})_9^{3+} C_3 \#5$       | [6+3]              | n/a                 | n/a                 |
| $\text{Sb}(\text{H}_2\text{O})_9^{3+} C_3 \#1 [6+3]$ | -155.3684014       | <b>-156.0376705</b> | <b>-156.0732980</b> |

|                                                      |                     |                     |                     |
|------------------------------------------------------|---------------------|---------------------|---------------------|
| $\text{Sb}(\text{H}_2\text{O})_9^{3+} D_3 [6+3]$     | -155.3607954        | -156.0455158        | -156.0810718        |
| $\text{Sb}(\text{H}_2\text{O})_9^{3+} C_3 \#2 [6+3]$ | <b>-155.4311137</b> | <b>-156.0669511</b> | <b>-156.1019455</b> |
| $\text{Sb}(\text{H}_2\text{O})_{18}^{3+} T [6+12]$   | -306.5774910        | -307.9928904        |                     |

|                                                      | HF/LANL2MB (5d)                      | HF/LANL2DZ (5d)     | HF/SDD (6d)         |
|------------------------------------------------------|--------------------------------------|---------------------|---------------------|
| $\text{H}_3\text{O}^+ D_{3h}$                        | -75.3283916                          | <b>-76.3001624</b>  | <b>-76.3002241</b>  |
| $\text{H}_3\text{O}^+ C_{3v}$                        | <b>-75.3304394</b>                   | n/a                 | n/a                 |
| $\text{Sb}^{3+} K_h$                                 | <b>-3.4308101</b>                    | <b>-3.4315119</b>   | <b>-3.4560761</b>   |
| $\text{SbOH}^{2+} D_{\infty h}$                      | <b>-78.8073115</b>                   | <b>-79.8488980</b>  | <b>-79.8667449</b>  |
| $\text{Sb}(\text{H}_2\text{O})^{3+} C_{2v}$          | <b>-78.6765203</b>                   | <b>-79.6848633</b>  | <b>-79.7084775</b>  |
| $\text{SbOH}(\text{H}_2\text{O})^{2+} C_s$           | <b>-153.9263384</b>                  | <b>-155.9884499</b> | <b>-156.0074347</b> |
| $\text{Sb}(\text{H}_2\text{O})_2^{3+} D_{2d}$        | -153.8077302                         | -155.8432825        | -155.8666983        |
| $\text{Sb}(\text{H}_2\text{O})_2^{3+} C_s$           | -153.8759971                         | -155.8901543        | -155.9136122        |
| $\text{Sb}(\text{H}_2\text{O})_2^{3+} C_2$           | (i.p. $C_{2v}$ ) <b>-153.8806852</b> | <b>-155.8910252</b> | <b>-155.9145084</b> |
| $\text{SbOH}(\text{H}_2\text{O})_2^{2+} C_s$         | <b>-229.0233050</b>                  | <b>-232.1073381</b> | <b>-232.1272457</b> |
| $\text{Sb}(\text{H}_2\text{O})_3^{3+} D_{3h} \#1$    | -228.9303700                         | -231.9989186        | -232.0234625        |
| $\text{Sb}(\text{H}_2\text{O})_3^{3+} D_{3h} \#2$    | -228.9524878                         | -232.0014927        | -232.0262880        |
| $\text{Sb}(\text{H}_2\text{O})_3^{3+} D_3$           | $D_{3h} \#2$                         | -232.0023796        | -232.0270944        |
| $\text{Sb}(\text{H}_2\text{O})_3^{3+} C_{3v} \#1$    | -229.0443588                         | -232.0590695        | -232.0824046        |
| $\text{Sb}(\text{H}_2\text{O})_3^{3+} C_{3v} \#2$    | -229.0316799                         | -232.0525031        | -232.0760822        |
| $\text{Sb}(\text{H}_2\text{O})_3^{3+} C_3$           | <b>-229.0444609</b>                  | <b>-232.0633633</b> | <b>-232.0866836</b> |
| $\text{Sb}(\text{H}_2\text{O})_3^{3+} [2+1] C_{2v}$  | -229.0022030                         | -232.0139063        | -232.0367272        |
| $\text{SbOH}(\text{H}_2\text{O})_3^{2+} C_s$         | <b>-304.0778370</b>                  | <b>-308.1922429</b> | <b>-308.2124882</b> |
| $\text{Sb}(\text{H}_2\text{O})_4^{2+} D_{2d} \#1$    | -304.0558112                         | -308.1339580        | -308.1595600        |
| $\text{Sb}(\text{H}_2\text{O})_4^{2+} D_{2d} \#2$    | -304.0557053                         | -308.1336481        | -308.1592623        |
| $\text{Sb}(\text{H}_2\text{O})_4^{2+} D_2$           | $D_{2d} \#1$                         | $D_{2d} \#1$        | $D_{2d} \#1$        |
| $\text{Sb}(\text{H}_2\text{O})_4^{2+} S_4$           | -304.0567238                         | -308.1351317        | -308.1607281        |
| $\text{Sb}(\text{H}_2\text{O})_4^{2+} C_{2v} \#1$    | -304.1253271                         | -308.1730727        | -308.1964933        |
| $\text{Sb}(\text{H}_2\text{O})_4^{2+} C_{2v} \#2$    | -304.1376393                         | -308.1750249        | -308.1982379        |
| $\text{Sb}(\text{H}_2\text{O})_4^{2+} C_{2v} \#3$    | -304.1395722                         | -308.1820987        | <b>-308.2053243</b> |
| $\text{Sb}(\text{H}_2\text{O})_4^{3+} C_2$           | -304.1401384                         | <b>-308.1820988</b> | n/a                 |
| $\text{Sb}(\text{H}_2\text{O})_4^{3+} C_s \#1$       | -304.1367597                         | n/a                 | n/a                 |
| $\text{Sb}(\text{H}_2\text{O})_4^{3+} C_s \#2$       | <b>-304.1411865</b>                  | n/a                 | n/a                 |
| $\text{Sb}(\text{H}_2\text{O})_4^{3+} [3+1] C_s \#1$ | -304.1373279                         | -308.1672284        | -308.1901526        |
| $\text{Sb}(\text{H}_2\text{O})_4^{3+} [3+1] C_s \#2$ | -304.1411966                         | -308.1692527        | -308.1921417        |
| $\text{SbOH}(\text{H}_2\text{O})_4^{2+} C_s \#1$     | -379.1111971                         | -384.2628689        | -384.2835074        |
| $\text{SbOH}(\text{H}_2\text{O})_4^{2+} C_s \#2$     | -379.1081140                         | -384.2614891        | -384.2825255        |
| $\text{Sb}(\text{H}_2\text{O})_5^{3+} C_{2v} \#1$    | -379.2104952                         | <b>-384.2854213</b> | <b>-384.3088769</b> |
| $\text{Sb}(\text{H}_2\text{O})_5^{3+} C_{2v} \#2$    | -379.1916587                         | -384.2683449        | -384.2922034        |
| $\text{Sb}(\text{H}_2\text{O})_5^{3+} C_{2v} \#3$    | -379.2087904                         | -384.2733625        | -384.2967893        |
| $\text{Sb}(\text{H}_2\text{O})_5^{3+} C_{2v} \#4$    | -379.1980813                         | -384.2709364        | -384.2946646        |
| $\text{Sb}(\text{H}_2\text{O})_5^{3+} C_2 \#1$       | -379.2106800                         | n/a                 | n/a                 |
| $\text{Sb}(\text{H}_2\text{O})_5^{3+} C_s \#3$       | -379.2104952                         | n/a                 | n/a                 |

|                                                         |                     |              |              |
|---------------------------------------------------------|---------------------|--------------|--------------|
| $\text{Sb}(\text{H}_2\text{O})_5^{3+} C_s \#3$          | -379.2047006        | n/a          | n/a          |
| $\text{Sb}(\text{H}_2\text{O})_5^{3+} C_s \#3$          | -379.2105012        | n/a          | n/a          |
| $\text{Sb}(\text{H}_2\text{O})_5^{3+} C_i \#1$          | <b>-379.2107065</b> | n/a          | n/a          |
| $\text{Sb}(\text{H}_2\text{O})_5^{3+} [4+1] C_{2v} \#1$ | <b>-379.2190566</b> | -384.2753106 | -384.2981787 |
| $\text{Sb}(\text{H}_2\text{O})_5^{3+} [4+1] C_{2v} \#2$ | -379.2113037        | -384.2724642 | -384.2954102 |

|                                                      | HF/LANL2MB (5d)     | HF/LANL2DZ (5d)                                                 | HF/SDD (6d)                                                     |
|------------------------------------------------------|---------------------|-----------------------------------------------------------------|-----------------------------------------------------------------|
| $\text{Sb}(\text{H}_2\text{O})_6^{3+} T_h$           | -454.1877578        | -460.3454156                                                    | -460.3712631                                                    |
| $\text{Sb}(\text{H}_2\text{O})_6^{3+} C_3$           | <b>-454.2370958</b> | <b>-460.3610939</b>                                             | <b>-460.3850775</b>                                             |
| $\text{Sb}(\text{H}_2\text{O})_6^{3+} [5+1] C_s \#1$ | -454.2832656        | $\text{SbOH}(\text{H}_2\text{O})_4^{2+} + \text{H}_3\text{O}^+$ | $\text{SbOH}(\text{H}_2\text{O})_4^{2+} + \text{H}_3\text{O}^+$ |
| $\text{Sb}(\text{H}_2\text{O})_6^{3+} [5+1] C_s \#2$ | -454.2831948        | $\text{SbOH}(\text{H}_2\text{O})_4^{2+} + \text{H}_3\text{O}^+$ | $\text{SbOH}(\text{H}_2\text{O})_4^{2+} + \text{H}_3\text{O}^+$ |
| $\text{Sb}(\text{H}_2\text{O})_7^{3+} C_{2v} \#1$    | [5+2]               | [5+2]                                                           | [5+2]                                                           |
| $\text{Sb}(\text{H}_2\text{O})_7^{3+} C_{2v} \#2$    | [5+2]               | [5+2]                                                           | [5+2]                                                           |
| $\text{Sb}(\text{H}_2\text{O})_7^{3+} C_{2v} \#3$    | -529.2187231        | -536.4082125                                                    | -536.4334248                                                    |
| $\text{Sb}(\text{H}_2\text{O})_7^{3+} C_{2v} \#4$    | [5+2]               | [5+2]                                                           | [5+2]                                                           |
| $\text{Sb}(\text{H}_2\text{O})_7^{3+} C_{2v} \#5$    | -529.2075847        | -536.3912294                                                    | -536.4167306                                                    |
| $\text{Sb}(\text{H}_2\text{O})_7^{3+} C_{2v} \#6$    | -529.2119779        | -536.3992397                                                    | -536.4249231                                                    |
| $\text{Sb}(\text{H}_2\text{O})_7^{3+} C_{2v} \#7$    | -529.2083711        | -536.3912637                                                    | -536.4167972                                                    |
| $\text{Sb}(\text{H}_2\text{O})_7^{3+} C_{2v} \#8$    | -529.2230971        | -536.4090304                                                    | -536.4342430                                                    |
| $\text{Sb}(\text{H}_2\text{O})_7^{3+} C_{2v} \#9$    | [5+2]               | -536.4086953                                                    | -536.4337520                                                    |
| $\text{Sb}(\text{H}_2\text{O})_7^{3+} C_{2v} \#10$   | [5+2]               | -536.3947251                                                    | -536.4199511                                                    |
| $\text{Sb}(\text{H}_2\text{O})_7^{3+} C_{2v} \#11$   | -529.2191491        | -536.4052468                                                    | -536.4304408                                                    |
| $\text{Sb}(\text{H}_2\text{O})_7^{3+} C_{2v} \#12$   | [5+2]               | [5+2]                                                           | -536.4205675                                                    |
| $\text{Sb}(\text{H}_2\text{O})_7^{3+} C_{2v} \#13$   | -529.2201580        | -536.4066358                                                    | -536.4317663                                                    |
| $\text{Sb}(\text{H}_2\text{O})_7^{3+} C_{2v} \#14$   | -529.2186058        | -536.4078128                                                    | -536.4331852                                                    |
| $\text{Sb}(\text{H}_2\text{O})_7^{3+} C_{2v} \#15$   | [4+3]               | -536.4102484                                                    | -536.4353688                                                    |
| $\text{Sb}(\text{H}_2\text{O})_7^{3+} C_{2v} \#16$   | -529.2235352        | -536.4150972                                                    | -536.4407213                                                    |
| $\text{Sb}(\text{H}_2\text{O})_7^{3+} C_2 \#3$       | [4+3]               | $C_2 \#11$                                                      | $C_2 \#11$                                                      |
| $\text{Sb}(\text{H}_2\text{O})_7^{3+} C_2 \#5$       | [5+2]               | [5+2]                                                           | [5+2]                                                           |
| $\text{Sb}(\text{H}_2\text{O})_7^{3+} C_2 \#6$       | [5+2]               | [5+2]                                                           | [5+2]                                                           |
| $\text{Sb}(\text{H}_2\text{O})_7^{3+} C_2 \#7$       | [5+2]               | [5+2]                                                           | [5+2]                                                           |
| $\text{Sb}(\text{H}_2\text{O})_7^{3+} C_2 \#8$       | [5+2]               | [5+2]                                                           | [5+2]                                                           |
| $\text{Sb}(\text{H}_2\text{O})_7^{3+} C_2 \#9$       | n/a                 | [5+2]                                                           | [5+2]                                                           |
| $\text{Sb}(\text{H}_2\text{O})_7^{3+} C_2 \#10$      | n/a                 | [5+2]                                                           | [5+2]                                                           |
| $\text{Sb}(\text{H}_2\text{O})_7^{3+} C_2 \#11$      | [4+3]               | -536.4148656                                                    | -536.4401363                                                    |
| $\text{Sb}(\text{H}_2\text{O})_7^{3+} C_2 \#12$      | n/a                 | n/a                                                             | [5+2]                                                           |
| $\text{Sb}(\text{H}_2\text{O})_7^{3+} C_2 \#13$      | [4+3]               | [5+2]                                                           | [5+2]                                                           |
| $\text{Sb}(\text{H}_2\text{O})_7^{3+} C_2 \#14$      | [4+3]               | [5+2]                                                           | [5+2]                                                           |
| $\text{Sb}(\text{H}_2\text{O})_7^{3+} C_2 \#15$      | n/a                 | [5+2]                                                           | [5+2]                                                           |
| $\text{Sb}(\text{H}_2\text{O})_7^{3+} C_2 \#16$      | [5+2]               | [5+2]                                                           | [5+2]                                                           |

|                                                                           | HF/LANL2MB (5d)                 | HF/LANL2DZ (5d)                                                   | HF/SDD (6d)                                                       |
|---------------------------------------------------------------------------|---------------------------------|-------------------------------------------------------------------|-------------------------------------------------------------------|
| Sb(H <sub>2</sub> O) <sub>7</sub> <sup>3+</sup> C <sub>s</sub> #3         | [6+1]                           | [5+2]                                                             | [6+1]                                                             |
| Sb(H <sub>2</sub> O) <sub>7</sub> <sup>3+</sup> C <sub>s</sub> #4         | [6+1]                           | [5+2]                                                             | [5+2]                                                             |
| Sb(H <sub>2</sub> O) <sub>7</sub> <sup>3+</sup> C <sub>s</sub> #5         | [6+1] -529.2935001              | [6+1], [4+3] + H xfer                                             | -536.4495732                                                      |
| Sb(H <sub>2</sub> O) <sub>7</sub> <sup>3+</sup> C <sub>s</sub> #6         | C <sub>2v</sub> #7 -529.2099142 | C <sub>2v</sub> #7 -536.3924318                                   | C <sub>2v</sub> #7 -536.4177339                                   |
| Sb(H <sub>2</sub> O) <sub>7</sub> <sup>3+</sup> C <sub>s</sub> #7         | -529.2417160                    | -536.4140719                                                      | -536.4390867                                                      |
| Sb(H <sub>2</sub> O) <sub>7</sub> <sup>3+</sup> C <sub>s</sub> #8         | C <sub>2v</sub> #8              | -536.4091746                                                      | -536.4342985                                                      |
| Sb(H <sub>2</sub> O) <sub>7</sub> <sup>3+</sup> C <sub>s</sub> #9         | C <sub>s</sub> #6               | C <sub>s</sub> #6                                                 | C <sub>s</sub> #6                                                 |
| Sb(H <sub>2</sub> O) <sub>7</sub> <sup>3+</sup> C <sub>s</sub> #10        | -529.2462820                    | -536.4115233                                                      | -536.4359166                                                      |
| Sb(H <sub>2</sub> O) <sub>7</sub> <sup>3+</sup> C <sub>s</sub> #11        | C <sub>s</sub> #26              | C <sub>s</sub> #26                                                | C <sub>s</sub> #26                                                |
| Sb(H <sub>2</sub> O) <sub>7</sub> <sup>3+</sup> C <sub>s</sub> #12        | n/a                             | C <sub>s</sub> #8                                                 | C <sub>s</sub> #8                                                 |
| Sb(H <sub>2</sub> O) <sub>7</sub> <sup>3+</sup> C <sub>s</sub> #13        | n/a                             | [6+1]                                                             | C <sub>s</sub> #5                                                 |
| Sb(H <sub>2</sub> O) <sub>7</sub> <sup>3+</sup> C <sub>s</sub> #14        | n/a                             | [5+2]                                                             | [5+2]                                                             |
| Sb(H <sub>2</sub> O) <sub>7</sub> <sup>3+</sup> C <sub>s</sub> #15        | n/a                             | [5+2]                                                             | C <sub>2v</sub> #12                                               |
| Sb(H <sub>2</sub> O) <sub>7</sub> <sup>3+</sup> C <sub>s</sub> #16        | [5+2]                           | C <sub>s</sub> #24                                                | C <sub>s</sub> #24                                                |
| Sb(H <sub>2</sub> O) <sub>7</sub> <sup>3+</sup> C <sub>s</sub> #17        | [5+2]                           | [5+2]                                                             | [5+2]                                                             |
| Sb(H <sub>2</sub> O) <sub>7</sub> <sup>3+</sup> C <sub>s</sub> #18        | n/a                             | n/a                                                               | C <sub>s</sub> #26                                                |
| Sb(H <sub>2</sub> O) <sub>7</sub> <sup>3+</sup> C <sub>s</sub> #20        | [6+1]                           | -536.4196485                                                      | -536.4440177                                                      |
| Sb(H <sub>2</sub> O) <sub>7</sub> <sup>3+</sup> C <sub>s</sub> #21        | [5+2]                           | SbOHAq <sub>5</sub> <sup>2+</sup> + H <sub>3</sub> O <sup>+</sup> | SbOHAq <sub>5</sub> <sup>2+</sup> + H <sub>3</sub> O <sup>+</sup> |
| Sb(H <sub>2</sub> O) <sub>7</sub> <sup>3+</sup> C <sub>s</sub> #22        | [6+1]                           | C <sub>s</sub> #7                                                 | C <sub>s</sub> #7                                                 |
| Sb(H <sub>2</sub> O) <sub>7</sub> <sup>3+</sup> C <sub>s</sub> #23        | [5+2]                           | [6+1]                                                             | -536.4430575                                                      |
| Sb(H <sub>2</sub> O) <sub>7</sub> <sup>3+</sup> C <sub>s</sub> #24        | n/a                             | -536.4151306                                                      | -536.4398922                                                      |
| Sb(H <sub>2</sub> O) <sub>7</sub> <sup>3+</sup> C <sub>s</sub> #25        | n/a                             | SbOHAq <sub>5</sub> <sup>2+</sup> + H <sub>3</sub> O <sup>+</sup> | SbOHAq <sub>5</sub> <sup>2+</sup> + H <sub>3</sub> O <sup>+</sup> |
| Sb(H <sub>2</sub> O) <sub>7</sub> <sup>3+</sup> C <sub>s</sub> #26        | -529.2516503                    | -536.4201602                                                      | -536.4448687                                                      |
| Sb(H <sub>2</sub> O) <sub>7</sub> <sup>3+</sup> C <sub>s</sub> #27        | [5+2]                           | [5+2]                                                             | C <sub>s</sub> #23                                                |
| Sb(H <sub>2</sub> O) <sub>7</sub> <sup>3+</sup> C <sub>2v</sub> #1 [5+2]  | -529.3220144                    | <b>-536.4456976</b>                                               | <b>-536.4684603</b>                                               |
| Sb(H <sub>2</sub> O) <sub>7</sub> <sup>3+</sup> C <sub>2v</sub> #10 [5+2] | -529.3095202                    |                                                                   |                                                                   |
| Sb(H <sub>2</sub> O) <sub>7</sub> <sup>3+</sup> C <sub>2v</sub> #12 [5+2] | -529.3160224                    | -536.4285056                                                      | -536.4511615                                                      |
| Sb(H <sub>2</sub> O) <sub>7</sub> <sup>3+</sup> C <sub>I</sub> #3         | n/a                             | <b>-536.4254643</b>                                               | <b>-536.4499689</b>                                               |
| Sb(H <sub>2</sub> O) <sub>7</sub> <sup>3+</sup> C <sub>I</sub> #8         | n/a                             | n/a                                                               | C <sub>I</sub> #3                                                 |
| Sb(H <sub>2</sub> O) <sub>7</sub> <sup>3+</sup> C <sub>I</sub> #9         | [6+1]                           | [5+2]                                                             | [5+2]                                                             |
| Sb(H <sub>2</sub> O) <sub>7</sub> <sup>3+</sup> C <sub>I</sub> #10        | [6+1]                           | [6+1]                                                             | C <sub>I</sub> #3                                                 |
| Sb(H <sub>2</sub> O) <sub>7</sub> <sup>3+</sup> C <sub>I</sub> #11        | n/a                             | C <sub>I</sub> #3                                                 | C <sub>I</sub> #3                                                 |
| Sb(H <sub>2</sub> O) <sub>7</sub> <sup>3+</sup> C <sub>I</sub> #12        | [5+2]                           | C <sub>I</sub> #3                                                 | C <sub>I</sub> #3                                                 |
| Sb(H <sub>2</sub> O) <sub>7</sub> <sup>3+</sup> C <sub>I</sub> #16        | n/a                             | [6+1]                                                             | C <sub>I</sub> #3                                                 |
| Sb(H <sub>2</sub> O) <sub>7</sub> <sup>3+</sup> C <sub>I</sub> #19        | n/a                             | n/a                                                               | C <sub>I</sub> #3                                                 |
| Sb(H <sub>2</sub> O) <sub>7</sub> <sup>3+</sup> C <sub>I</sub> #20        | n/a                             | [5+2]                                                             | [5+2]                                                             |
| Sb(H <sub>2</sub> O) <sub>7</sub> <sup>3+</sup> C <sub>I</sub> #21        | [5+2]                           | C <sub>I</sub> #3                                                 | C <sub>I</sub> #3                                                 |



|                                                   | HF/LANL2MB (5d)           | HF/LANL2DZ (5d)     | HF/SDD (6d)         |
|---------------------------------------------------|---------------------------|---------------------|---------------------|
| $\text{Sb}(\text{H}_2\text{O})_8^{3+} D_{4h} \#1$ | -604.2064771              | -612.4265230        | -612.4520348        |
| $\text{Sb}(\text{H}_2\text{O})_8^{3+} D_{4h} \#2$ | -604.2067691              | -612.4268093        | -612.4523146        |
| $\text{Sb}(\text{H}_2\text{O})_8^{3+} D_{4d} \#1$ | -604.2293060              | -612.4628223        | -612.4883421        |
| $\text{Sb}(\text{H}_2\text{O})_8^{3+} D_{4d} \#2$ | -604.2274667              | -612.4596069        | -612.4852455        |
| $\text{Sb}(\text{H}_2\text{O})_8^{3+} S_8 \#1$    | -604.2413486              | <b>-612.4857484</b> | <b>-612.5114638</b> |
| $\text{Sb}(\text{H}_2\text{O})_8^{3+} S_8 \#2$    | $S_8 \#1$                 | $S_8 \#1$           | $S_8 \#1$           |
| $\text{Sb}(\text{H}_2\text{O})_8^{3+} D_4 \#1$    | -604.2353365              | -612.4746846        | -612.5004146        |
| $\text{Sb}(\text{H}_2\text{O})_8^{3+} D_4 \#2$    | $D_4 \#1$                 | $D_4 \#1$           | $D_4 \#1$           |
| $\text{Sb}(\text{H}_2\text{O})_8^{3+} D_4 \#3$    | $D_4 \#1$                 | $D_4 \#1$           | $D_4 \#1$           |
| $\text{Sb}(\text{H}_2\text{O})_8^{3+} D_4 \#4$    | $D_4 \#1$                 | $D_4 \#1$           | $D_4 \#1$           |
| $\text{Sb}(\text{H}_2\text{O})_8^{3+} C_{4v} \#1$ | -604.2414582              | n/a                 | n/a                 |
| $\text{Sb}(\text{H}_2\text{O})_8^{3+} C_{4v} \#2$ | -604.2338174              | n/a                 | n/a                 |
| $\text{Sb}(\text{H}_2\text{O})_8^{3+} C_{4h} \#1$ | -604.2248509              | -612.4628577        | -612.4885145        |
| $\text{Sb}(\text{H}_2\text{O})_8^{3+} C_{4h} \#2$ | $C_{4h} \#1$              | $C_{4h} \#1$        | $C_{4h} \#1$        |
| $\text{Sb}(\text{H}_2\text{O})_8^{3+} D_{2h} \#1$ | $D_{4h} \#2$              | $D_{4h} \#2$        | $D_{4h} \#2$        |
| $\text{Sb}(\text{H}_2\text{O})_8^{3+} D_{2d} \#1$ | -604.2182495              | -612.4494804        | -612.4750850        |
| $\text{Sb}(\text{H}_2\text{O})_8^{3+} D_{2d} \#2$ | -604.2226973              | -612.4531356        | -612.4787760        |
| $\text{Sb}(\text{H}_2\text{O})_8^{3+} D_{2d} \#3$ | $D_{2d} \#1$              | $D_{2d} \#1$        | $D_{2d} \#1$        |
| $\text{Sb}(\text{H}_2\text{O})_8^{3+} D_{2d} \#4$ | -604.2262881              | -612.4523923        | -612.4779644        |
| $\text{Sb}(\text{H}_2\text{O})_8^{3+} D_{2d} \#5$ | -604.2342995              | -612.4744367        | -612.5001684        |
| $\text{Sb}(\text{H}_2\text{O})_8^{3+} C_4 \#1$    | [4+4] -604.3909089        | $S_8 \#1$           | $S_8 \#1$           |
| $\text{Sb}(\text{H}_2\text{O})_8^{3+} C_4 \#2$    | $C_4 \#1$                 | n/a                 | n/a                 |
| $\text{Sb}(\text{H}_2\text{O})_8^{3+} C_4 \#3$    | $C_4 \#1$                 | n/a                 | n/a                 |
| $\text{Sb}(\text{H}_2\text{O})_8^{3+} C_4 \#4$    | $C_4 \#1$                 | n/a                 | n/a                 |
| $\text{Sb}(\text{H}_2\text{O})_8^{3+} S_4 \#1$    | $D_{2d} \#5$              | $D_{2d} \#5$        | $D_{2d} \#5$        |
| $\text{Sb}(\text{H}_2\text{O})_8^{3+} S_4 \#2$    | -604.2346901              | -612.4736941        | -612.4993978        |
| $\text{Sb}(\text{H}_2\text{O})_8^{3+} S_4 \#3$    | $S_4 \#2$                 | $S_4 \#2$           | $S_4 \#2$           |
| $\text{Sb}(\text{H}_2\text{O})_8^{3+} S_4 \#4$    | $S_4 \#2$                 | $S_4 \#2$           | $S_4 \#2$           |
| $\text{Sb}(\text{H}_2\text{O})_8^{3+} D_2 \#1$    | -604.2379545              | -612.4784528        | -612.5041682        |
| $\text{Sb}(\text{H}_2\text{O})_8^{3+} D_2 \#2$    | $D_2 \#1$                 | $D_2 \#1$           | $D_2 \#1$           |
| $\text{Sb}(\text{H}_2\text{O})_8^{3+} D_2 \#3$    | $D_2 \#1$                 | $D_2 \#1$           | $D_2 \#1$           |
| $\text{Sb}(\text{H}_2\text{O})_8^{3+} D_2 \#4$    | $D_2 \#1$                 | $D_2 \#1$           | $D_2 \#1$           |
| $\text{Sb}(\text{H}_2\text{O})_8^{3+} D_2 \#5$    | $D_2 \#1$                 | $D_2 \#1$           | $D_2 \#1$           |
| $\text{Sb}(\text{H}_2\text{O})_8^{3+} C_{2v} \#1$ | [4+4] -604.3869861        | [4+4] -612.5078578  | [4+4] -612.5296362  |
| $\text{Sb}(\text{H}_2\text{O})_8^{3+} C_{2v} \#2$ | -604.2231784              | n/a                 | n/a                 |
| $\text{Sb}(\text{H}_2\text{O})_8^{3+} C_{2v} \#4$ | [6+2] -604.3190986        | n/a                 | n/a                 |
| $\text{Sb}(\text{H}_2\text{O})_8^{3+} C_{2v} \#5$ | -604.2519474              | n/a                 | n/a                 |
| $\text{Sb}(\text{H}_2\text{O})_8^{3+} C_{2v} \#6$ | -604.2611095              | n/a                 | n/a                 |
| $\text{Sb}(\text{H}_2\text{O})_8^{3+} C_{2v} \#7$ | -604.2338180              | n/a                 | n/a                 |
| $\text{Sb}(\text{H}_2\text{O})_8^{3+} C_2 \#1$    | [4+4] <b>-604.3930643</b> | $D_2 \#1$           | $D_2 \#1$           |
| $\text{Sb}(\text{H}_2\text{O})_8^{3+} C_2 \#2$    | $C_2 \#1$                 | $S_8 \#1$           | $S_8 \#1$           |
|                                                   |                           |                     |                     |
| $\text{Sb}(\text{H}_2\text{O})_8^{3+} D_{2h} \#1$ | -604.2224575              | n/a                 | n/a                 |
| $\text{Sb}(\text{H}_2\text{O})_8^{3+} C_{2h} \#2$ | -604.2231666              | n/a                 | n/a                 |

|                                                   |                           |     |     |
|---------------------------------------------------|---------------------------|-----|-----|
| $\text{Sb}(\text{H}_2\text{O})_8^{3+} C_{2v} \#1$ | [6+2] -604.2565870        | n/a | n/a |
| $\text{Sb}(\text{H}_2\text{O})_8^{3+} C_{2v} \#3$ | -604.2267693              | n/a | n/a |
| $\text{Sb}(\text{H}_2\text{O})_8^{3+} C_4 \#1$    | [4+4] -604.3909088        | n/a | n/a |
| $\text{Sb}(\text{H}_2\text{O})_8^{3+} C_s \#1$    | [5+3] -604.3592495        | n/a | n/a |
| $\text{Sb}(\text{H}_2\text{O})_8^{3+} C_s \#2$    | [6+2] -604.3389899        | n/a | n/a |
| $\text{Sb}(\text{H}_2\text{O})_8^{3+} C_s \#3$    | [4+4] -604.3869861        | n/a | n/a |
| $\text{Sb}(\text{H}_2\text{O})_8^{3+} C_I \#1$    | [6+2] <b>-604.3382108</b> | n/a | n/a |

|                                                      | HF/LANL2MB (5d)     | HF/LANL2DZ (5d)     | HF/SDD (6d)         |
|------------------------------------------------------|---------------------|---------------------|---------------------|
| $\text{Sb}(\text{H}_2\text{O})_9^{3+} D_{3h} \#1$    | -679.2392122        | -688.5134387        | -688.5388794        |
| $\text{Sb}(\text{H}_2\text{O})_9^{3+} D_{3h} \#2$    | -679.2252417        | -688.4794014        | -688.5046403        |
| $\text{Sb}(\text{H}_2\text{O})_9^{3+} D_{3h} \#3$    | -679.2226456        | -688.4888448        | -688.5143900        |
| $\text{Sb}(\text{H}_2\text{O})_9^{3+} D_{3h} \#4$    | -679.2405066        | -688.5192176        | -688.5447768        |
| $\text{Sb}(\text{H}_2\text{O})_9^{3+} D_3 \#1$       | -679.2482891        | -688.5332665        | -688.5588150        |
| $\text{Sb}(\text{H}_2\text{O})_9^{3+} D_3 \#2$       | $D_3 \#1$           | $D_3 \#1$           | $D_3 \#1$           |
| $\text{Sb}(\text{H}_2\text{O})_9^{3+} D_3 \#3$       | $D_3 \#1$           | $D_3 \#1$           | $D_3 \#1$           |
| $\text{Sb}(\text{H}_2\text{O})_9^{3+} D_3 \#4$       | $D_3 \#1$           | $D_3 \#1$           | $D_3 \#1$           |
| $\text{Sb}(\text{H}_2\text{O})_9^{3+} C_{3h} \#1$    | -679.2440199        | -688.5225732        | -688.5481255        |
| $\text{Sb}(\text{H}_2\text{O})_9^{3+} C_{3h} \#2$    | -679.2421220        | -688.5232999        | -688.5488116        |
| $\text{Sb}(\text{H}_2\text{O})_9^{3+} C_{3h} \#3$    | $C_{3h} \#1$        | $C_{3h} \#1$        | $C_{3h} \#1$        |
| $\text{Sb}(\text{H}_2\text{O})_9^{3+} C_{3h} \#4$    | $C_{3h} \#2$        | $C_{3h} \#2$        | $C_{3h} \#2$        |
| $\text{Sb}(\text{H}_2\text{O})_9^{3+} C_{3v} \#1$    | -679.2432649        | n/a                 | n/a                 |
| $\text{Sb}(\text{H}_2\text{O})_9^{3+} C_{3v} \#2$    | [6+3] -679.3596403  | [6+3] -688.5529638  | [6+3] -688.5764421  |
| $\text{Sb}(\text{H}_2\text{O})_9^{3+} C_{3v} \#3$    | -679.2274133        | [6+3] -688.5316995  | [6+3] -688.5564487  |
| $\text{Sb}(\text{H}_2\text{O})_9^{3+} C_{3v} \#4$    | -679.2412617        | n/a                 | n/a                 |
| $\text{Sb}(\text{H}_2\text{O})_9^{3+} C_3 \#1$       | [6+3]               | n/a                 | n/a                 |
| $\text{Sb}(\text{H}_2\text{O})_9^{3+} C_3 \#2$       | [6+3]               | [6+3]               | [6+3]               |
| $\text{Sb}(\text{H}_2\text{O})_9^{3+} C_3 \#3$       | [6+3]               | n/a                 | n/a                 |
| $\text{Sb}(\text{H}_2\text{O})_9^{3+} C_3 \#4$       | [6+3]               | n/a                 | n/a                 |
| $\text{Sb}(\text{H}_2\text{O})_9^{3+} C_3 \#5$       | [6+3]               | n/a                 | n/a                 |
| $\text{Sb}(\text{H}_2\text{O})_9^{3+} C_3 \#1 [6+3]$ | -679.3265562        | <b>-688.5591255</b> | <b>-688.5831920</b> |
| $\text{Sb}(\text{H}_2\text{O})_9^{3+} D_3 [6+3]$     | -679.3022021        | -688.5644005        | -688.5903519        |
| $\text{Sb}(\text{H}_2\text{O})_9^{3+} C_3 \#2 [6+3]$ | <b>-679.3876817</b> | <b>-688.5869110</b> | <b>-688.6104140</b> |
| $\text{Sb}(\text{H}_2\text{O})_{18}^{3+} T [6+12]$   | -1354.3684678       | -1373.0133805       | -1373.0401422       |

|                                 | MP2/CEP-31G*       | MP2/CEP-121G*      | MP2/gen (5d)<br>M: CEP-121G*<br>OH: 6-31G* | MP2/gen (5d)<br>M: CEP-121G*<br>OH: 6-31+G* |
|---------------------------------|--------------------|--------------------|--------------------------------------------|---------------------------------------------|
| $\text{H}_3\text{O}^+ D_{3h}$   | -17.3009663        | -17.3164953        | -76.4676869                                | -76.4701581                                 |
| $\text{H}_3\text{O}^+ C_{3v}$   | <b>-17.3045552</b> | <b>-17.3209842</b> | <b>-76.4717194</b>                         | <b>-76.4743392</b>                          |
| $\text{Sb}^{3+} K_h$            | <b>-3.4964312</b>  | <b>-3.4964312</b>  | <b>-3.4964312</b>                          | <b>-3.4964312</b>                           |
| $\text{SbOH}^{2+} D_{\infty h}$ | <b>-20.9435204</b> | <b>-20.9585048</b> | <b>-80.1130636</b>                         | <b>-80.1230272</b>                          |

|                                                         |                    |                    |                     |                     |
|---------------------------------------------------------|--------------------|--------------------|---------------------|---------------------|
| $\text{Sb}(\text{H}_2\text{O})^{3+} C_{2v}$             | <b>-20.7571370</b> | <b>-20.7726419</b> | <b>-79.9290012</b>  | <b>-79.9337746</b>  |
| $\text{SbOH}(\text{H}_2\text{O})^{2+} C_s$              | <b>-38.0872104</b> | <b>-38.1186372</b> | <b>-156.4265649</b> | <b>-156.4404073</b> |
| $\text{Sb}(\text{H}_2\text{O})_2^{3+} D_{2d}$           | -37.9336966        | -37.9644968        | -156.2717081        | -156.2829469        |
| $\text{Sb}(\text{H}_2\text{O})_2^{3+} C_s$              | -37.9693745        | -38.0013761        | -156.3110386        | -156.3210818        |
| $\text{Sb}(\text{H}_2\text{O})_2^{3+} C_2$              | <b>-37.9709592</b> | <b>-38.0024894</b> | <b>-156.3124674</b> | <b>-156.3223744</b> |
| $\text{SbOH}(\text{H}_2\text{O})_2^{2+} C_s$            | <b>-55.2105186</b> | <b>-55.2584800</b> | <b>-232.7176413</b> | <b>-232.7385692</b> |
| $\text{Sb}(\text{H}_2\text{O})_3^{3+} D_{3h} \#1$       | -55.0989191        | -55.1466896        | -232.6055112        | -232.6230454        |
| $\text{Sb}(\text{H}_2\text{O})_3^{3+} D_{3h} \#2$       | -55.1055719        | -55.1523555        | -232.6109096        | -232.6280864        |
| $\text{Sb}(\text{H}_2\text{O})_3^{3+} D_3$              | -55.1060480        | -55.1531705        | -232.6116715        | -232.6292563        |
| $\text{Sb}(\text{H}_2\text{O})_3^{3+} C_{3v} \#1$       | -55.1453289        | -55.1934091        | -232.6554103        | -232.6733489        |
| $\text{Sb}(\text{H}_2\text{O})_3^{3+} C_{3v} \#2$       | -55.1399828        | -55.1883826        | -232.6499947        | -232.6674829        |
| $\text{Sb}(\text{H}_2\text{O})_3^{3+} C_3$              | <b>-55.1508887</b> | <b>-55.1997688</b> | <b>-232.6607978</b> | <b>-232.6783981</b> |
| $\text{Sb}(\text{H}_2\text{O})_3^{3+} [2+1] C_{2v}$     | -55.1179253        | -55.1636858        | -232.6275422        | -232.6428930        |
| $\text{SbOH}(\text{H}_2\text{O})_3^{2+} C_s$            | <b>-72.3078482</b> | -72.3721115        | -308.9795080        | <b>-309.0095545</b> |
| $\text{Sb}(\text{H}_2\text{O})_4^{2+} D_{2d} \#1$       | -72.2508891        | -72.3142722        | -308.9225195        | -308.9502967        |
| $\text{Sb}(\text{H}_2\text{O})_4^{2+} D_{2d} \#2$       | -72.2502258        | -72.3135957        | -308.9221204        | -308.9498671        |
| $\text{Sb}(\text{H}_2\text{O})_4^{2+} D_2$              | $D_{2d} \#1$       | $D_{2d} \#1$       | $D_{2d} \#1$        | $D_{2d} \#1$        |
| $\text{Sb}(\text{H}_2\text{O})_4^{2+} S_4$              | -72.2517022        | -72.3155032        | -308.9235799        | -308.9520893        |
| $\text{Sb}(\text{H}_2\text{O})_4^{2+} C_{2v} \#1$       | -72.2763389        | -72.3407410        | -308.9515722        | -308.9759379        |
| $\text{Sb}(\text{H}_2\text{O})_4^{2+} C_{2v} \#2$       | -72.2751641        | -72.3394405        | 308.9498719         | -308.9749658        |
| $\text{Sb}(\text{H}_2\text{O})_4^{2+} C_{2v} \#3$       | -72.2839881        | -72.3485326        | <b>-308.9596893</b> | <b>-308.9843712</b> |
| $\text{Sb}(\text{H}_2\text{O})_4^{3+} C_2$              | <b>-72.2839895</b> | <b>-72.3486911</b> | n/a                 | n/a                 |
| $\text{Sb}(\text{H}_2\text{O})_4^{3+} [3+1] C_s \#1$    | -72.2756445        | -72.3391781        | -308.9533524        | -308.9765831        |
| $\text{Sb}(\text{H}_2\text{O})_4^{3+} [3+1] C_s \#2$    | -72.2772101        | -72.3402691        | -308.9548471        | -308.9782294        |
| $\text{SbOH}(\text{H}_2\text{O})_4^{2+} C_s \#1$        | -89.3944172        | -89.4746922        | -385.2305473        | -385.2700447        |
| $\text{SbOH}(\text{H}_2\text{O})_4^{2+} C_s \#2$        | <b>-89.3964223</b> | <b>-89.4773526</b> | <b>-385.2332807</b> | <b>-385.2723336</b> |
| $\text{Sb}(\text{H}_2\text{O})_5^{3+} C_{2v} \#1$       | <b>-89.4053322</b> | <b>-89.4866013</b> | <b>-385.2441383</b> | <b>-385.2778438</b> |
| $\text{Sb}(\text{H}_2\text{O})_5^{3+} C_{2v} \#2$       | -89.3891732        | -89.4696320        | -385.2278362        | -385.2613205        |
| $\text{Sb}(\text{H}_2\text{O})_5^{3+} C_{2v} \#3$       | -89.3905152        | -89.4702866        | -385.2296401        | -385.2625615        |
| $\text{Sb}(\text{H}_2\text{O})_5^{3+} C_{2v} \#4$       | -89.3893617        | -89.4694423        | -385.2274210        | -385.2618034        |
| $\text{Sb}(\text{H}_2\text{O})_5^{3+} [4+1] C_{2v} \#1$ | -89.3959385        | -89.4751802        | -385.2377412        | -385.2697490        |
| $\text{Sb}(\text{H}_2\text{O})_5^{3+} [4+1] C_{2v} \#2$ | -89.3943659        | -89.4742035        | -385.2365906        | -385.2678048        |
| $\text{Sb}(\text{H}_2\text{O})_5^{3+} [4+1] C_2 \#1$    | -89.3959517        | -89.4755194        | -385.2379309        | -385.2698176        |

|                                                                               | MP2/CEP-31G*             | MP2/CEP-121G*            | MP2/gen (5d)<br>M: CEP-121G*<br>OH: 6-31G* | MP2/gen (5d)<br>M: CEP-121G*<br>OH: 6-31+G* |
|-------------------------------------------------------------------------------|--------------------------|--------------------------|--------------------------------------------|---------------------------------------------|
| Sb(H <sub>2</sub> O) <sub>6</sub> <sup>3+</sup> <i>T<sub>h</sub></i>          | -106.4926475             | -106.5891811             | -461.4880920                               | -461.5407216                                |
| Sb(H <sub>2</sub> O) <sub>6</sub> <sup>3+</sup> <i>C<sub>3</sub></i>          | <b>-106.5016567</b>      | <b>-106.5988702</b>      | <b>-461.5041846</b>                        | <b>-461.5475308</b>                         |
| Sb(H <sub>2</sub> O) <sub>6</sub> <sup>3+</sup> [5+1] <i>C<sub>s</sub></i> #1 | proton transfer          | proton transfer          | proton transfer                            | proton transfer                             |
| Sb(H <sub>2</sub> O) <sub>6</sub> <sup>3+</sup> [5+1] <i>C<sub>s</sub></i> #2 | proton transfer          | proton transfer          | proton transfer                            | proton transfer                             |
| Sb(H <sub>2</sub> O) <sub>7</sub> <sup>3+</sup> <i>C<sub>2v</sub></i> #1      | -123.5854377             | [5+2]                    | [5+2]                                      | [5+2]                                       |
| Sb(H <sub>2</sub> O) <sub>7</sub> <sup>3+</sup> <i>C<sub>2v</sub></i> #2      | -123.5758369             | -123.6876824             | [5+2]                                      | -537.7966813                                |
| Sb(H <sub>2</sub> O) <sub>7</sub> <sup>3+</sup> <i>C<sub>2v</sub></i> #3      | -123.5728450             | -123.6845110             | [4+3]                                      | [6+1]                                       |
| Sb(H <sub>2</sub> O) <sub>7</sub> <sup>3+</sup> <i>C<sub>2v</sub></i> #4      | [5+2]                    | [5+2]                    | [5+2]                                      | [5+2]                                       |
| Sb(H <sub>2</sub> O) <sub>7</sub> <sup>3+</sup> <i>C<sub>2v</sub></i> #5      | -123.5555450             | -123.6667451             | -537.7179437                               | -537.7758286                                |
| Sb(H <sub>2</sub> O) <sub>7</sub> <sup>3+</sup> <i>C<sub>2v</sub></i> #6      | -123.5660883             | -123.6777953             | -537.7278686                               | -537.7862877                                |
| Sb(H <sub>2</sub> O) <sub>7</sub> <sup>3+</sup> <i>C<sub>2v</sub></i> #7      | -123.5568248             | -123.6692822             | -537.7214384                               | -537.7779005                                |
| Sb(H <sub>2</sub> O) <sub>7</sub> <sup>3+</sup> <i>C<sub>2v</sub></i> #8      | -123.5747636             | -123.6874493             | -537.7375120                               | -537.7951939                                |
| Sb(H <sub>2</sub> O) <sub>7</sub> <sup>3+</sup> <i>C<sub>2v</sub></i> #9      | -123.5756813             | -123.6874032             | -537.7376952                               | -537.7952493                                |
| Sb(H <sub>2</sub> O) <sub>7</sub> <sup>3+</sup> <i>C<sub>2v</sub></i> #10     | -123.5619762             | -123.6718650             | -537.7221767                               | -537.7813129                                |
| Sb(H <sub>2</sub> O) <sub>7</sub> <sup>3+</sup> <i>C<sub>2v</sub></i> #11     | -123.5692633             | -123.6803848             | -537.7316463                               | -537.7898408                                |
| Sb(H <sub>2</sub> O) <sub>7</sub> <sup>3+</sup> <i>C<sub>2v</sub></i> #12     | -123.5619760             | -123.6718648             | -537.7218688                               | -537.7813115                                |
| Sb(H <sub>2</sub> O) <sub>7</sub> <sup>3+</sup> <i>C<sub>2v</sub></i> #13     | -123.5714460             | -123.6834061             | -537.7339083                               | -537.7918490                                |
| Sb(H <sub>2</sub> O) <sub>7</sub> <sup>3+</sup> <i>C<sub>2v</sub></i> #14     | -123.5733052             | -123.6848870             | -537.7352021                               | -537.7934037                                |
| Sb(H <sub>2</sub> O) <sub>7</sub> <sup>3+</sup> <i>C<sub>2v</sub></i> #15     | -123.5751298             | -123.6873303             | -537.7372133                               | -537.7956465                                |
| Sb(H <sub>2</sub> O) <sub>7</sub> <sup>3+</sup> <i>C<sub>2v</sub></i> #16     | -123.5819987             | -123.6939889             | -537.7422039                               | -537.8026076                                |
| Sb(H <sub>2</sub> O) <sub>7</sub> <sup>3+</sup> <i>C<sub>2</sub></i> #1       | <i>C<sub>2</sub></i> #16 | n/a                      | n/a                                        | n/a                                         |
| Sb(H <sub>2</sub> O) <sub>7</sub> <sup>3+</sup> <i>C<sub>2</sub></i> #2       | <i>C<sub>2</sub></i> #16 | <i>C<sub>2</sub></i> #16 | n/a                                        | <i>C<sub>2</sub></i> #16                    |
| Sb(H <sub>2</sub> O) <sub>7</sub> <sup>3+</sup> <i>C<sub>2</sub></i> #3       | <i>C<sub>2</sub></i> #16 | <i>C<sub>2</sub></i> #16 | n/a                                        | n/a                                         |
| Sb(H <sub>2</sub> O) <sub>7</sub> <sup>3+</sup> <i>C<sub>2</sub></i> #5       | <i>C<sub>2</sub></i> #16 | <i>C<sub>2</sub></i> #16 | <i>C<sub>2</sub></i> #6                    | <i>C<sub>2</sub></i> #16                    |
| Sb(H <sub>2</sub> O) <sub>7</sub> <sup>3+</sup> <i>C<sub>2</sub></i> #6       | <i>C<sub>2</sub></i> #16 | <i>C<sub>2</sub></i> #16 | -537.7430786                               | <i>C<sub>2</sub></i> #16                    |
| Sb(H <sub>2</sub> O) <sub>7</sub> <sup>3+</sup> <i>C<sub>2</sub></i> #7       | <i>C<sub>2</sub></i> #16 | <i>C<sub>2</sub></i> #16 | <i>C<sub>2</sub></i> #13                   | <i>C<sub>2</sub></i> #16                    |
| Sb(H <sub>2</sub> O) <sub>7</sub> <sup>3+</sup> <i>C<sub>2</sub></i> #8       | <i>C<sub>2</sub></i> #16 | <i>C<sub>2</sub></i> #16 | [5+2]                                      | <i>C<sub>2</sub></i> #16                    |
| Sb(H <sub>2</sub> O) <sub>7</sub> <sup>3+</sup> <i>C<sub>2</sub></i> #9       | <i>C<sub>2</sub></i> #16 | <i>C<sub>2</sub></i> #16 | [5+2]                                      | <i>C<sub>2</sub></i> #16                    |
| Sb(H <sub>2</sub> O) <sub>7</sub> <sup>3+</sup> <i>C<sub>2</sub></i> #10      | <i>C<sub>2</sub></i> #16 | <i>C<sub>2</sub></i> #16 | <i>C<sub>2</sub></i> #6                    | <i>C<sub>2</sub></i> #16                    |
| Sb(H <sub>2</sub> O) <sub>7</sub> <sup>3+</sup> <i>C<sub>2</sub></i> #11      | <i>C<sub>2</sub></i> #16 | <i>C<sub>2</sub></i> #16 | -537.7431704                               | <i>C<sub>2</sub></i> #16                    |
| Sb(H <sub>2</sub> O) <sub>7</sub> <sup>3+</sup> <i>C<sub>2</sub></i> #12      | <i>C<sub>2</sub></i> #16 | <i>C<sub>2</sub></i> #16 | [5+2]                                      | <i>C<sub>2</sub></i> #16                    |
| Sb(H <sub>2</sub> O) <sub>7</sub> <sup>3+</sup> <i>C<sub>2</sub></i> #13      | <i>C<sub>2</sub></i> #16 | <i>C<sub>2</sub></i> #16 | -537.7433431                               | <i>C<sub>2</sub></i> #16                    |
| Sb(H <sub>2</sub> O) <sub>7</sub> <sup>3+</sup> <i>C<sub>2</sub></i> #14      | <i>C<sub>2</sub></i> #16 | <i>C<sub>2</sub></i> #16 | <i>C<sub>2</sub></i> #13                   | <i>C<sub>2</sub></i> #16                    |
| Sb(H <sub>2</sub> O) <sub>7</sub> <sup>3+</sup> <i>C<sub>2</sub></i> #15      | <i>C<sub>2</sub></i> #16 | <i>C<sub>2</sub></i> #16 | <i>C<sub>2</sub></i> #13                   | <i>C<sub>2</sub></i> #16                    |
| Sb(H <sub>2</sub> O) <sub>7</sub> <sup>3+</sup> <i>C<sub>2</sub></i> #16      | -123.5865535             | -123.6993311             | [5+2]                                      | -537.8068390                                |

|                                                                                                                                            | MP2/CEP-31G*                                                                                        | MP2/CEP-121G*                                                                                                          | MP2/gen (5d)<br>M: CEP-121G*<br>OH: 6-31G*                           | MP2/gen (5d)<br>M: CEP-121G*<br>OH: 6-31+G*                          |
|--------------------------------------------------------------------------------------------------------------------------------------------|-----------------------------------------------------------------------------------------------------|------------------------------------------------------------------------------------------------------------------------|----------------------------------------------------------------------|----------------------------------------------------------------------|
| Sb(H <sub>2</sub> O) <sub>7</sub> <sup>3+</sup> C <sub>s</sub> #1                                                                          | C <sub>s</sub> #5                                                                                   | n/a                                                                                                                    | n/a                                                                  | n/a                                                                  |
| Sb(H <sub>2</sub> O) <sub>7</sub> <sup>3+</sup> C <sub>s</sub> #2                                                                          | C <sub>s</sub> #7                                                                                   | C <sub>s</sub> #7                                                                                                      | n/a                                                                  | C <sub>s</sub> #7                                                    |
| Sb(H <sub>2</sub> O) <sub>7</sub> <sup>3+</sup> C <sub>s</sub> #3                                                                          | C <sub>s</sub> #10                                                                                  | C <sub>s</sub> #10                                                                                                     | n/a                                                                  | n/a                                                                  |
| Sb(H <sub>2</sub> O) <sub>7</sub> <sup>3+</sup> C <sub>s</sub> #4                                                                          | C <sub>2v</sub> #1                                                                                  | [5+2]                                                                                                                  | n/a                                                                  | n/a                                                                  |
| Sb(H <sub>2</sub> O) <sub>7</sub> <sup>3+</sup> C <sub>s</sub> #5                                                                          | -123.5870918                                                                                        | -123.7004156                                                                                                           | -537.7493664                                                         | -537.8069848                                                         |
| Sb(H <sub>2</sub> O) <sub>7</sub> <sup>3+</sup> C <sub>s</sub> #6                                                                          | C <sub>2v</sub> #7                                                                                  | C <sub>2v</sub> #7                                                                                                     | C <sub>2v</sub> #7                                                   | C <sub>2v</sub> #7                                                   |
| Sb(H <sub>2</sub> O) <sub>7</sub> <sup>3+</sup> C <sub>s</sub> #7                                                                          | -123.5798424                                                                                        | -123.6923281                                                                                                           | -537.7440619                                                         | -537.8003498                                                         |
| Sb(H <sub>2</sub> O) <sub>7</sub> <sup>3+</sup> C <sub>s</sub> #8                                                                          | -123.5747708                                                                                        | -123.6875172                                                                                                           | -537.7383005                                                         | C <sub>2v</sub> #8                                                   |
| Sb(H <sub>2</sub> O) <sub>7</sub> <sup>3+</sup> C <sub>s</sub> #10                                                                         | -123.5787751                                                                                        | -123.6906842                                                                                                           | -537.7412480                                                         | -537.7993227                                                         |
| Sb(H <sub>2</sub> O) <sub>7</sub> <sup>3+</sup> C <sub>s</sub> #11                                                                         | C <sub>s</sub> #26                                                                                  | C <sub>s</sub> #26                                                                                                     | [5+2]                                                                | C <sub>s</sub> #26                                                   |
| Sb(H <sub>2</sub> O) <sub>7</sub> <sup>3+</sup> C <sub>s</sub> #12                                                                         | C <sub>s</sub> #8                                                                                   | C <sub>s</sub> #8                                                                                                      | C <sub>s</sub> #8                                                    | n/a                                                                  |
| Sb(H <sub>2</sub> O) <sub>7</sub> <sup>3+</sup> C <sub>s</sub> #13                                                                         | C <sub>s</sub> #5                                                                                   | C <sub>s</sub> #5                                                                                                      | [6+1]                                                                | C <sub>s</sub> #5                                                    |
| Sb(H <sub>2</sub> O) <sub>7</sub> <sup>3+</sup> C <sub>s</sub> #14                                                                         | C <sub>s</sub> #7                                                                                   | C <sub>s</sub> #7                                                                                                      | C <sub>s</sub> #7                                                    | C <sub>s</sub> #7                                                    |
| Sb(H <sub>2</sub> O) <sub>7</sub> <sup>3+</sup> C <sub>s</sub> #15                                                                         | C <sub>2v</sub> #10                                                                                 | C <sub>2v</sub> #10                                                                                                    | C <sub>2v</sub> #10                                                  | C <sub>2v</sub> #10                                                  |
| Sb(H <sub>2</sub> O) <sub>7</sub> <sup>3+</sup> C <sub>s</sub> #16                                                                         | C <sub>s</sub> #10                                                                                  | C <sub>s</sub> #10                                                                                                     | C <sub>s</sub> #10                                                   | C <sub>s</sub> #10                                                   |
| Sb(H <sub>2</sub> O) <sub>7</sub> <sup>3+</sup> C <sub>s</sub> #17                                                                         | -123.5756813                                                                                        | -123.6874034                                                                                                           | -537.7345858                                                         | -537.7952492                                                         |
| Sb(H <sub>2</sub> O) <sub>7</sub> <sup>3+</sup> C <sub>s</sub> #18                                                                         | C <sub>s</sub> #26                                                                                  | C <sub>s</sub> #26                                                                                                     | C <sub>s</sub> #26                                                   | C <sub>s</sub> #26                                                   |
| Sb(H <sub>2</sub> O) <sub>7</sub> <sup>3+</sup> C <sub>s</sub> #19                                                                         | C <sub>s</sub> #15                                                                                  | C <sub>s</sub> #15                                                                                                     | C <sub>s</sub> #15                                                   | C <sub>s</sub> #15                                                   |
| Sb(H <sub>2</sub> O) <sub>7</sub> <sup>3+</sup> C <sub>s</sub> #20                                                                         | -123.5827814                                                                                        | -123.6961636                                                                                                           | C <sub>s</sub> #5                                                    | -537.8027280                                                         |
| Sb(H <sub>2</sub> O) <sub>7</sub> <sup>3+</sup> C <sub>s</sub> #21                                                                         | -123.5767829                                                                                        | SbOHAq <sub>5</sub> <sup>2+</sup> +<br>H <sub>3</sub> O <sup>+</sup>                                                   | SbOHAq <sub>5</sub> <sup>2+</sup> +<br>H <sub>3</sub> O <sup>+</sup> | SbOHAq <sub>5</sub> <sup>2+</sup> +<br>H <sub>3</sub> O <sup>+</sup> |
| Sb(H <sub>2</sub> O) <sub>7</sub> <sup>3+</sup> C <sub>s</sub> #22                                                                         | C <sub>s</sub> #7                                                                                   | C <sub>s</sub> #7                                                                                                      | C <sub>s</sub> #7                                                    | C <sub>s</sub> #7                                                    |
| Sb(H <sub>2</sub> O) <sub>7</sub> <sup>3+</sup> C <sub>s</sub> #23                                                                         | -123.5831955                                                                                        | -123.6957337                                                                                                           | [6+1]                                                                | -537.8035883                                                         |
| Sb(H <sub>2</sub> O) <sub>7</sub> <sup>3+</sup> C <sub>s</sub> #24                                                                         | C <sub>s</sub> #10                                                                                  | -123.6905657                                                                                                           | -537.7424392                                                         | C <sub>s</sub> #10                                                   |
| Sb(H <sub>2</sub> O) <sub>7</sub> <sup>3+</sup> C <sub>s</sub> #25                                                                         | C <sub>s</sub> #21                                                                                  | [6+1]                                                                                                                  | SbOHAq <sub>5</sub> <sup>2+</sup> +<br>H <sub>3</sub> O <sup>+</sup> | SbOHAq <sub>5</sub> <sup>2+</sup> +<br>H <sub>3</sub> O <sup>+</sup> |
| Sb(H <sub>2</sub> O) <sub>7</sub> <sup>3+</sup> C <sub>s</sub> #26                                                                         | -123.5835146                                                                                        | -123.6959600                                                                                                           | -537.7467739                                                         | -537.8031975                                                         |
| Sb(H <sub>2</sub> O) <sub>7</sub> <sup>3+</sup> C <sub>s</sub> #27                                                                         | C <sub>s</sub> #23                                                                                  | C <sub>s</sub> #23                                                                                                     | [6+1]                                                                | C <sub>s</sub> #23                                                   |
| Sb(H <sub>2</sub> O) <sub>7</sub> <sup>3+</sup> C <sub>2v</sub> [5+2]                                                                      | -123.5865538                                                                                        | -123.6993312                                                                                                           |                                                                      |                                                                      |
| Sb(H <sub>2</sub> O) <sub>7</sub> <sup>3+</sup> C <sub>2v</sub> #12<br>[5+2]                                                               | Sb(H <sub>2</sub> O) <sub>3</sub> (OH) <sub>2</sub> <sup>+</sup><br>+2H <sub>3</sub> O <sup>+</sup> |                                                                                                                        |                                                                      |                                                                      |
| Sb(H <sub>2</sub> O) <sub>3</sub> (OH) <sub>2</sub> <sup>+</sup><br>+2H <sub>3</sub> O <sup>+</sup> C <sub>2v</sub> #1                     | <b>-123.6047957</b>                                                                                 | Sb(H <sub>2</sub> O) <sub>2</sub> (OH) <sub>2</sub> <sup>+</sup> +<br>H <sub>2</sub> O +2H <sub>3</sub> O <sup>+</sup> |                                                                      |                                                                      |
| Sb(H <sub>2</sub> O) <sub>3</sub> (OH) <sub>2</sub> <sup>+</sup><br>+2H <sub>3</sub> O <sup>+</sup> C <sub>2v</sub> #12                    | -123.5806262                                                                                        | -123.6892007                                                                                                           |                                                                      |                                                                      |
| Sb(H <sub>2</sub> O) <sub>2</sub> (OH) <sub>2</sub> <sup>+</sup> + H <sub>2</sub> O<br>+2H <sub>3</sub> O <sup>+</sup> C <sub>2v</sub> #1  |                                                                                                     | -123.7379707                                                                                                           | -537.7958369                                                         | -537.8474576                                                         |
| Sb(H <sub>2</sub> O) <sub>2</sub> (OH) <sub>2</sub> <sup>+</sup> + H <sub>2</sub> O<br>+2H <sub>3</sub> O <sup>+</sup> C <sub>2v</sub> #12 |                                                                                                     |                                                                                                                        | -537.7755747                                                         | -537.8286347                                                         |
| Sb(H <sub>2</sub> O) <sub>7</sub> <sup>3+</sup> C <sub>I</sub> #2                                                                          | n/a                                                                                                 | n/a                                                                                                                    | [5+2]                                                                | n/a                                                                  |
| Sb(H <sub>2</sub> O) <sub>7</sub> <sup>3+</sup> C <sub>I</sub> #3                                                                          | n/a                                                                                                 | n/a                                                                                                                    | [6+1]                                                                | n/a                                                                  |
| Sb(H <sub>2</sub> O) <sub>7</sub> <sup>3+</sup> C <sub>I</sub> #4                                                                          | n/a                                                                                                 | n/a                                                                                                                    | [6+1]                                                                | n/a                                                                  |

|                                                                    |                     |                     |       |                     |
|--------------------------------------------------------------------|---------------------|---------------------|-------|---------------------|
| Sb(H <sub>2</sub> O) <sub>7</sub> <sup>3+</sup> C <sub>1</sub> #5  | <b>-123.5878549</b> | <b>-123.7008595</b> | n/a   | <b>-537.8079765</b> |
| Sb(H <sub>2</sub> O) <sub>7</sub> <sup>3+</sup> C <sub>1</sub> #8  | C <sub>1</sub> #5   | C <sub>1</sub> #5   | [5+2] | C <sub>1</sub> #5   |
| Sb(H <sub>2</sub> O) <sub>7</sub> <sup>3+</sup> C <sub>1</sub> #10 | C <sub>1</sub> #5   | C <sub>1</sub> #5   | [5+2] | C <sub>1</sub> #5   |
| Sb(H <sub>2</sub> O) <sub>7</sub> <sup>3+</sup> C <sub>1</sub> #11 | C <sub>1</sub> #5   | C <sub>1</sub> #5   | [5+2] | n/a                 |
| Sb(H <sub>2</sub> O) <sub>7</sub> <sup>3+</sup> C <sub>1</sub> #12 | C <sub>1</sub> #5   | C <sub>1</sub> #5   | [5+2] | C <sub>1</sub> #5   |
| Sb(H <sub>2</sub> O) <sub>7</sub> <sup>3+</sup> C <sub>1</sub> #15 | C <sub>1</sub> #5   | C <sub>1</sub> #5   | [5+2] | C <sub>1</sub> #5   |
| Sb(H <sub>2</sub> O) <sub>7</sub> <sup>3+</sup> C <sub>1</sub> #16 | C <sub>1</sub> #5   | C <sub>1</sub> #5   | n/a   | C <sub>1</sub> #5   |
| Sb(H <sub>2</sub> O) <sub>7</sub> <sup>3+</sup> C <sub>1</sub> #17 | C <sub>1</sub> #5   | n/a                 | n/a   | n/a                 |
| Sb(H <sub>2</sub> O) <sub>7</sub> <sup>3+</sup> C <sub>1</sub> #19 | C <sub>1</sub> #5   | C <sub>1</sub> #5   | n/a   | C <sub>1</sub> #5   |
| Sb(H <sub>2</sub> O) <sub>7</sub> <sup>3+</sup> C <sub>1</sub> #20 | n/a                 | C <sub>1</sub> #5   | [5+2] | n/a                 |
| Sb(H <sub>2</sub> O) <sub>7</sub> <sup>3+</sup> C <sub>1</sub> #21 | C <sub>1</sub> #5   | C <sub>1</sub> #5   | [6+1] | C <sub>1</sub> #5   |

|                                                                    | MP2/CEP-31G*        | MP2/CEP-121G*       | MP2/gen (5d)<br>M: CEP-121G*<br>OH: 6-31G* | MP2/gen (5d)<br>M: CEP-121G*<br>OH: 6-31+G* |
|--------------------------------------------------------------------|---------------------|---------------------|--------------------------------------------|---------------------------------------------|
| Sb(H <sub>2</sub> O) <sub>8</sub> <sup>3+</sup> D <sub>4h</sub> #1 | -140.6137869        | -140.7394741        | -613.9410372                               | -614.0073375                                |
| Sb(H <sub>2</sub> O) <sub>8</sub> <sup>3+</sup> D <sub>4h</sub> #2 | -140.6145080        | -140.7404067        | -613.9421391                               | -614.0081562                                |
| Sb(H <sub>2</sub> O) <sub>8</sub> <sup>3+</sup> D <sub>4d</sub> #1 | -140.6487462        | -140.7757898        | -613.9744276                               | -614.0426831                                |
| Sb(H <sub>2</sub> O) <sub>8</sub> <sup>3+</sup> D <sub>4d</sub> #2 | -140.6483732        | -140.7740459        | -613.9728677                               | -614.0429895                                |
| Sb(H <sub>2</sub> O) <sub>8</sub> <sup>3+</sup> S <sub>8</sub> #1  | <b>-140.6730119</b> | <b>-140.8006821</b> | <b>-613.9966816</b>                        | <b>-614.0685084</b>                         |
| Sb(H <sub>2</sub> O) <sub>8</sub> <sup>3+</sup> S <sub>8</sub> #2  | S <sub>8</sub> #1   | S <sub>8</sub> #1   | S <sub>8</sub> #1                          | S <sub>8</sub> #1                           |
| Sb(H <sub>2</sub> O) <sub>8</sub> <sup>3+</sup> D <sub>4</sub> #1  | -140.6631590        | -140.7910931        | -613.9874850                               | -614.0587759                                |
| Sb(H <sub>2</sub> O) <sub>8</sub> <sup>3+</sup> D <sub>4</sub> #2  | D <sub>4</sub> #1   | D <sub>4</sub> #1   | D <sub>4</sub> #1                          | D <sub>4</sub> #1                           |
| Sb(H <sub>2</sub> O) <sub>8</sub> <sup>3+</sup> D <sub>4</sub> #3  | D <sub>4</sub> #1   | D <sub>4</sub> #1   | D <sub>4</sub> #1                          | D <sub>4</sub> #1                           |
| Sb(H <sub>2</sub> O) <sub>8</sub> <sup>3+</sup> D <sub>4</sub> #4  | D <sub>4</sub> #1   | D <sub>4</sub> #1   | D <sub>4</sub> #1                          | D <sub>4</sub> #1                           |
| Sb(H <sub>2</sub> O) <sub>8</sub> <sup>3+</sup> C <sub>4h</sub> #1 | -140.6515679        | -140.7802955        | -613.9781802                               | -614.0472085                                |
| Sb(H <sub>2</sub> O) <sub>8</sub> <sup>3+</sup> C <sub>4h</sub> #2 | C <sub>4h</sub> #1  | C <sub>4h</sub> #1  | C <sub>4h</sub> #1                         | C <sub>4h</sub> #1                          |
| Sb(H <sub>2</sub> O) <sub>8</sub> <sup>3+</sup> D <sub>2h</sub> #1 | D <sub>4h</sub> #2  | D <sub>4h</sub> #2  | D <sub>4h</sub> #2                         | D <sub>4h</sub> #2                          |
| Sb(H <sub>2</sub> O) <sub>8</sub> <sup>3+</sup> D <sub>2d</sub> #1 | -140.6400765        | -140.7678290        | -613.9668209                               | -614.0349750                                |
| Sb(H <sub>2</sub> O) <sub>8</sub> <sup>3+</sup> D <sub>2d</sub> #2 | -140.6418519        | -140.7674762        | -613.9664211                               | -614.0360146                                |
| Sb(H <sub>2</sub> O) <sub>8</sub> <sup>3+</sup> D <sub>2d</sub> #3 | D <sub>2d</sub> #1  | D <sub>2d</sub> #1  | D <sub>2d</sub> #1                         | D <sub>2d</sub> #1                          |
| Sb(H <sub>2</sub> O) <sub>8</sub> <sup>3+</sup> D <sub>2d</sub> #4 | -140.6413835        | -140.7688696        | -613.9692782                               | -614.0367830                                |
| Sb(H <sub>2</sub> O) <sub>8</sub> <sup>3+</sup> D <sub>2d</sub> #5 | -140.6630477        | -140.7909094        | -613.9873132                               | -614.0587531                                |
| Sb(H <sub>2</sub> O) <sub>8</sub> <sup>3+</sup> C <sub>4</sub> #1  | S <sub>8</sub> #1   | S <sub>8</sub> #1   | S <sub>8</sub> #1                          | S <sub>8</sub> #1                           |
| Sb(H <sub>2</sub> O) <sub>8</sub> <sup>3+</sup> S <sub>4</sub> #1  | D <sub>2d</sub> #5  | D <sub>2d</sub> #5  | D <sub>2d</sub> #5                         | D <sub>2d</sub> #5                          |
| Sb(H <sub>2</sub> O) <sub>8</sub> <sup>3+</sup> S <sub>4</sub> #2  | -140.6627869        | -140.7907340        | -613.9871649                               | -614.0574488                                |
| Sb(H <sub>2</sub> O) <sub>8</sub> <sup>3+</sup> S <sub>4</sub> #3  | S <sub>4</sub> #2   | S <sub>4</sub> #2   | S <sub>4</sub> #2                          | S <sub>4</sub> #2                           |
| Sb(H <sub>2</sub> O) <sub>8</sub> <sup>3+</sup> S <sub>4</sub> #4  | S <sub>4</sub> #2   | D <sub>2d</sub> #5  | S <sub>4</sub> #2                          | D <sub>2d</sub> #5                          |
| Sb(H <sub>2</sub> O) <sub>8</sub> <sup>3+</sup> D <sub>2</sub> #1  | -140.6662559        | -140.7938882        | -613.9905241                               | -614.0617473                                |
| Sb(H <sub>2</sub> O) <sub>8</sub> <sup>3+</sup> D <sub>2</sub> #2  | D <sub>2</sub> #1   | D <sub>2</sub> #1   | D <sub>2</sub> #1                          | D <sub>2</sub> #1                           |
| Sb(H <sub>2</sub> O) <sub>8</sub> <sup>3+</sup> D <sub>2</sub> #3  | D <sub>2</sub> #1   | D <sub>2</sub> #1   | D <sub>2</sub> #1                          | D <sub>2</sub> #1                           |
| Sb(H <sub>2</sub> O) <sub>8</sub> <sup>3+</sup> D <sub>2</sub> #4  | D <sub>2</sub> #1   | D <sub>2</sub> #1   | D <sub>2</sub> #1                          | D <sub>2</sub> #1                           |
| Sb(H <sub>2</sub> O) <sub>8</sub> <sup>3+</sup> D <sub>2</sub> #5  | D <sub>2</sub> #1   | D <sub>2</sub> #1   | D <sub>2</sub> #1                          | D <sub>2</sub> #1                           |

|                                                |              |              |              |              |
|------------------------------------------------|--------------|--------------|--------------|--------------|
| $\text{Sb}(\text{H}_2\text{O})_8^{3+} C_2 \#1$ | -140.6665393 | -140.7943830 | -613.9922423 | -614.0620472 |
| $\text{Sb}(\text{H}_2\text{O})_8^{3+} C_2 \#2$ | $S_8 \#1$    | $S_8 \#1$    | $S_8 \#1$    | $S_8 \#1$    |

|                                                      | MP2/CEP-31G*          | MP2/CEP-121G*         | MP2/gen (5d)<br>M: CEP-121G*<br>OH: 6-31G* | MP2/gen (5d)<br>M: CEP-121G*<br>OH: 6-31+G* |
|------------------------------------------------------|-----------------------|-----------------------|--------------------------------------------|---------------------------------------------|
| $\text{Sb}(\text{H}_2\text{O})_9^{3+} D_{3h} \#1$    | -157.7230960          | -157.8662428          | -690.2117104                               | -690.2925510                                |
| $\text{Sb}(\text{H}_2\text{O})_9^{3+} D_{3h} \#2$    | -157.6878787          | -157.8297544          | -690.1775834                               | -690.2564165                                |
| $\text{Sb}(\text{H}_2\text{O})_9^{3+} D_{3h} \#3$    | -157.6996023          | -157.8428207          | -690.1895806                               | -690.2720072                                |
| $\text{Sb}(\text{H}_2\text{O})_9^{3+} D_{3h} \#4$    | -157.7317734          | -157.8751617          | -690.2199346                               | -690.3010862                                |
| $\text{Sb}(\text{H}_2\text{O})_9^{3+} D_3 \#1$       | <b>-157.7441294</b>   | -157.8879753          | -690.2315171                               | -690.3142216                                |
| $\text{Sb}(\text{H}_2\text{O})_9^{3+} D_3 \#2$       | $D_3 \#1$             | $D_3 \#1$             | $D_3 \#1$                                  | $D_3 \#1$                                   |
| $\text{Sb}(\text{H}_2\text{O})_9^{3+} D_3 \#3$       | $D_3 \#1$             | $D_3 \#1$             | $D_3 \#1$                                  | $D_3 \#1$                                   |
| $\text{Sb}(\text{H}_2\text{O})_9^{3+} D_3 \#4$       | $D_3 \#1$             | $D_3 \#1$             | $D_3 \#1$                                  | $D_3 \#1$                                   |
| $\text{Sb}(\text{H}_2\text{O})_9^{3+} C_{3h} \#1$    | -157.7370466          | -157.8807051          | -690.2264705                               | -690.3065951                                |
| $\text{Sb}(\text{H}_2\text{O})_9^{3+} C_{3h} \#2$    | -157.7341023          | -157.8777583          | -690.2218972                               | -690.3042632                                |
| $\text{Sb}(\text{H}_2\text{O})_9^{3+} C_{3h} \#3$    | $C_{3h} \#1$          | $C_{3h} \#1$          | $C_{3h} \#1$                               | $C_{3h} \#1$                                |
| $\text{Sb}(\text{H}_2\text{O})_9^{3+} C_{3h} \#4$    | $C_{3h} \#2$          | $C_{3h} \#2$          | $C_{3h} \#2$                               | $C_{3h} \#2$                                |
| $\text{Sb}(\text{H}_2\text{O})_9^{3+} C_{3v} \#2$    | [6+3]<br>-157.7412304 | [6+3]<br>-157.8809091 | [6+3]<br>-690.2344761                      | [6+3]<br>-690.3293430                       |
| $\text{Sb}(\text{H}_2\text{O})_9^{3+} C_{3v} \#3$    | [6+3]<br>-157.7345560 | [6+3]<br>-157.8793549 | [6+3]<br>-690.2354031                      | [6+3]<br>-690.3066202                       |
| $\text{Sb}(\text{H}_2\text{O})_9^{3+} D_3 [6+3]$     | -157.7712390          | -157.9135715          | -690.2668004                               | -690.3425276                                |
| $\text{Sb}(\text{H}_2\text{O})_9^{3+} C_3 \#1$       | n/a                   | n/a                   | [6+3]                                      | n/a                                         |
| $\text{Sb}(\text{H}_2\text{O})_9^{3+} C_3 \#2$       | -157.7371339          | -157.8810704          | $C_3 \#3$                                  | [6+3]                                       |
| $\text{Sb}(\text{H}_2\text{O})_9^{3+} C_3 \#3$       | $D_3 \#1$             | $D_3 \#1$             | -690.2269659                               | -690.3072321                                |
| $\text{Sb}(\text{H}_2\text{O})_9^{3+} C_3 \#1 [6+3]$ | <b>-157.7536859</b>   | <b>-157.8968050</b>   | <b>-690.2481182</b>                        | <b>-690.3206965</b>                         |
| $\text{Sb}(\text{H}_2\text{O})_9^{3+} C_3 \#2 [6+3]$ | <b>-157.7853989</b>   | <b>-157.9271329</b>   | <b>-690.2844568</b>                        | <b>-690.3531483</b>                         |

|                                               | HF/gen (5d)<br>M: CEP-121G*<br>OH: 6-31G* | HF/gen (5d)<br>M: LANL2DZ<br>OH: 6-31G* | HF/gen (5d)<br>M: SDD<br>OH: 6-31G* |
|-----------------------------------------------|-------------------------------------------|-----------------------------------------|-------------------------------------|
| $\text{H}_3\text{O}^+ D_{3h}$                 | -76.2843091                               | n/a                                     | n/a                                 |
| $\text{H}_3\text{O}^+ C_{3v}$                 | <b>-76.2872019</b>                        | n/a                                     | n/a                                 |
| $\text{Sb}^{3+} K_h$                          | <b>-3.4762496</b>                         | <b>-3.4315119</b>                       | <b>-3.4560761</b>                   |
| $\text{SbOH}^{2+} D_{\infty h}$               | <b>-79.8738668</b>                        | <b>-79.8417216</b>                      | <b>-79.8560540</b>                  |
| $\text{Sb}(\text{H}_2\text{O})^{3+} C_{2v}$   | <b>-79.7082145</b>                        | <b>-79.6719322</b>                      | <b>-79.6948352</b>                  |
| $\text{SbOH}(\text{H}_2\text{O})^{2+} C_s$    | <b>-156.0048849</b>                       | <b>-155.9694325</b>                     | <b>-155.9865546</b>                 |
| $\text{Sb}(\text{H}_2\text{O})_2^{3+} D_{2d}$ | -155.8497035                              | -155.8150550                            | -155.8380937                        |
| $\text{Sb}(\text{H}_2\text{O})_2^{3+} C_s$    | -155.8972125                              | -155.8632140                            | -155.8856774                        |
| $\text{Sb}(\text{H}_2\text{O})_2^{3+} C_2$    | <b>-155.8981591</b>                       | <b>-155.8640722</b>                     | <b>-155.8865553</b>                 |
| $\text{SbOH}(\text{H}_2\text{O})_2^{2+} C_s$  | <b>-232.1127771</b>                       | <b>-232.0756673</b>                     | <b>-232.0935774</b>                 |

|                                                         |                     |                     |                     |
|---------------------------------------------------------|---------------------|---------------------|---------------------|
| $\text{Sb}(\text{H}_2\text{O})_3^{3+} D_{3h} \#1$       | -231.9915204        | -231.9583180        | -231.9823400        |
| $\text{Sb}(\text{H}_2\text{O})_3^{3+} D_{3h} \#2$       | -231.9937308        | -231.9601123        | -231.9844469        |
| $\text{Sb}(\text{H}_2\text{O})_3^{3+} D_3$              | -231.9946808        | -231.9612212        | -231.9854379        |
| $\text{Sb}(\text{H}_2\text{O})_3^{3+} C_{3v} \#1$       | -232.0521690        | -232.0180934        | -232.0404288        |
| $\text{Sb}(\text{H}_2\text{O})_3^{3+} C_{3v} \#2$       | -232.0461132        | -232.0123872        | -232.0349748        |
| $\text{Sb}(\text{H}_2\text{O})_3^{3+} C_3$              | <b>-232.0569291</b> | <b>-232.0228750</b> | <b>-232.0450968</b> |
| $\text{Sb}(\text{H}_2\text{O})_3^{3+} [2+1] C_{2v}$     | -232.0106318        | -231.9764442        | -231.9978215        |
| $\text{SbOH}(\text{H}_2\text{O})_3^{2+} C_s$            | <b>-308.1866249</b> | <b>-308.1493814</b> | <b>-308.1677101</b> |
| $\text{Sb}(\text{H}_2\text{O})_4^{2+} D_{2d} \#1$       | -308.1143408        | -308.0813108        | -308.1062944        |
| $\text{Sb}(\text{H}_2\text{O})_4^{2+} D_{2d} \#2$       | -308.1140495        | -308.0810475        | -308.1060293        |
| $\text{Sb}(\text{H}_2\text{O})_4^{2+} D_2$              | $D_{2d} \#1$        | $D_{2d} \#1$        | $D_{2d} \#1$        |
| $\text{Sb}(\text{H}_2\text{O})_4^{2+} S_4$              | -308.1153447        | -308.0823508        | -308.1073164        |
| $\text{Sb}(\text{H}_2\text{O})_4^{2+} C_{2v} \#1$       | -308.1559670        | -308.1221091        | -301.1444658        |
| $\text{Sb}(\text{H}_2\text{O})_4^{2+} C_{2v} \#2$       | -308.1557684        | -308.1220415        | -308.1443602        |
| $\text{Sb}(\text{H}_2\text{O})_4^{2+} C_{2v} \#3$       | <b>-308.1642251</b> | <b>-308.1302763</b> | <b>-308.1524691</b> |
| $\text{Sb}(\text{H}_2\text{O})_4^{3+} [3+1] C_s \#1$    | -308.1513620        | -308.1168815        | -308.1384625        |
| $\text{Sb}(\text{H}_2\text{O})_4^{3+} [3+1] C_s \#2$    | -308.1528707        | -308.1183066        | -308.1398996        |
| $\text{SbOH}(\text{H}_2\text{O})_4^{2+} C_s \#1$        | -384.2482513        | -384.2110335        | -384.2298286        |
| $\text{SbOH}(\text{H}_2\text{O})_4^{2+} C_s \#2$        | <b>-384.2492581</b> | <b>-384.2118910</b> | <b>-384.2307229</b> |
| $\text{Sb}(\text{H}_2\text{O})_5^{3+} C_{2v} \#1$       | <b>-384.2563856</b> | <b>-384.2226327</b> | <b>-384.2450550</b> |
| $\text{Sb}(\text{H}_2\text{O})_5^{3+} C_{2v} \#2$       | -384.2406990        | -384.2070988        | -384.2298966        |
| $\text{Sb}(\text{H}_2\text{O})_5^{3+} C_{2v} \#3$       | -384.2438141        | -384.2104947        | -384.2330695        |
| $\text{Sb}(\text{H}_2\text{O})_5^{3+} C_{2v} \#4$       | -384.2412830        | -384.2079290        | -384.2307655        |
| $\text{Sb}(\text{H}_2\text{O})_5^{3+} [4+1] C_{2v} \#1$ | <b>-384.2472610</b> | <b>-384.2128990</b> | <b>-384.2346403</b> |
| $\text{Sb}(\text{H}_2\text{O})_5^{3+} [4+1] C_{2v} \#2$ | -384.2455684        | -384.2111277        | -384.2327898        |
| $\text{Sb}(\text{H}_2\text{O})_6^{3+} T_h$              | -460.3038506        | -460.2707479        | -460.2958606        |
| $\text{Sb}(\text{H}_2\text{O})_6^{3+} C_3$              | <b>-460.3251186</b> | <b>-460.2912939</b> | <b>-460.3141284</b> |
| $\text{Sb}(\text{H}_2\text{O})_6^{3+} [5+1] C_s \#1$    | -460.3293950        | -460.2953447        | -460.3173893        |
| $\text{Sb}(\text{H}_2\text{O})_6^{3+} [5+1] C_s \#2$    | <b>-460.3357925</b> | <b>-460.3015281</b> | <b>-460.3234794</b> |

|                                                    | HF/gen (5d)<br>M: CEP-121G*<br>OH: 6-31G* | HF/gen (5d)<br>M: LANL2DZ<br>OH: 6-31G* | HF/gen (5d)<br>M: SDD<br>OH: 6-31G* |
|----------------------------------------------------|-------------------------------------------|-----------------------------------------|-------------------------------------|
| $\text{Sb}(\text{H}_2\text{O})_7^{3+} C_{2v} \#1$  | [5+2]                                     | [5+2]                                   | [5+2]                               |
| $\text{Sb}(\text{H}_2\text{O})_7^{3+} C_{2v} \#2$  | [5+2]                                     | [5+2]                                   | [5+2]                               |
| $\text{Sb}(\text{H}_2\text{O})_7^{3+} C_{2v} \#3$  | 536.3646000                               | -536.3318165                            | -536.3559276                        |
| $\text{Sb}(\text{H}_2\text{O})_7^{3+} C_{2v} \#4$  | [5+2]                                     | [5+2]                                   | [5+2]                               |
| $\text{Sb}(\text{H}_2\text{O})_7^{3+} C_{2v} \#5$  | -536.3491789                              | -536.3163585                            | -536.3408320                        |
| $\text{Sb}(\text{H}_2\text{O})_7^{3+} C_{2v} \#6$  | -536.3552721                              | -536.3224006                            | -536.3472173                        |
| $\text{Sb}(\text{H}_2\text{O})_7^{3+} C_{2v} \#7$  | -536.3525701                              | -536.3195717                            | -536.3436233                        |
| $\text{Sb}(\text{H}_2\text{O})_7^{3+} C_{2v} \#8$  | -536.3670051                              | -536.3337782                            | -536.3578205                        |
| $\text{Sb}(\text{H}_2\text{O})_7^{3+} C_{2v} \#9$  | -536.3665516                              | -536.3333788                            | -536.3571553                        |
| $\text{Sb}(\text{H}_2\text{O})_7^{3+} C_{2v} \#10$ | -536.3527630                              | -536.3200283                            | -536.3441500                        |



|                                                    |              |              |              |
|----------------------------------------------------|--------------|--------------|--------------|
| $\text{Sb}(\text{H}_2\text{O})_7^{3+} C_{2v} \#11$ | -536.3615613 | -536.3287889 | -536.3529939 |
| $\text{Sb}(\text{H}_2\text{O})_7^{3+} C_{2v} \#12$ | -536.3532351 | -536.3205321 | -536.3445097 |
| $\text{Sb}(\text{H}_2\text{O})_7^{3+} C_{2v} \#13$ | -536.3637057 | -536.3307402 | -536.3548773 |
| $\text{Sb}(\text{H}_2\text{O})_7^{3+} C_{2v} \#14$ | -536.3642439 | -536.3313745 | -536.3556364 |
| $\text{Sb}(\text{H}_2\text{O})_7^{3+} C_{2v} \#15$ | -536.3664403 | -536.3334037 | -536.3575319 |
| $\text{Sb}(\text{H}_2\text{O})_7^{3+} C_{2v} \#16$ | -536.3697857 | -536.3368261 | -536.3612822 |
| $\text{Sb}(\text{H}_2\text{O})_7^{3+} C_2 \#3$     | $C_2 \#11$   | $C_2 \#11$   | $C_2 \#11$   |
| $\text{Sb}(\text{H}_2\text{O})_7^{3+} C_2 \#5$     | $C_2 \#6$    | $C_2 \#6$    | $C_2 \#6$    |
| $\text{Sb}(\text{H}_2\text{O})_7^{3+} C_2 \#6$     | -536.3710953 | -536.3381535 | -536.3623779 |
| $\text{Sb}(\text{H}_2\text{O})_7^{3+} C_2 \#7$     | $C_2 \#13$   | $C_2 \#13$   | $C_2 \#13$   |
| $\text{Sb}(\text{H}_2\text{O})_7^{3+} C_2 \#8$     | [5+2]        | [5+2]        | [5+2]        |
| $\text{Sb}(\text{H}_2\text{O})_7^{3+} C_2 \#9$     | [5+2]        | [5+2]        | [5+2]        |
| $\text{Sb}(\text{H}_2\text{O})_7^{3+} C_2 \#10$    | $C_2 \#6$    | $C_2 \#6$    | $C_2 \#11$   |
| $\text{Sb}(\text{H}_2\text{O})_7^{3+} C_2 \#11$    | -536.3715725 | -536.3386560 | -536.3627311 |
| $\text{Sb}(\text{H}_2\text{O})_7^{3+} C_2 \#12$    | [5+2]        | [5+2]        | [5+2]        |
| $\text{Sb}(\text{H}_2\text{O})_7^{3+} C_2 \#13$    | -536.3713118 | -536.3381938 | -536.3622840 |
| $\text{Sb}(\text{H}_2\text{O})_7^{3+} C_2 \#14$    | $C_2 \#13$   | $C_2 \#13$   | $C_2 \#13$   |
| $\text{Sb}(\text{H}_2\text{O})_7^{3+} C_2 \#15$    | $C_2 \#13$   | $C_2 \#13$   | $C_2 \#13$   |
| $\text{Sb}(\text{H}_2\text{O})_7^{3+} C_2 \#16$    | [5+2]        | [5+2]        | [5+2]        |

|                                                 | HF/gen (5d)<br>M: CEP-121G*<br>OH: 6-31G* | HF/gen (5d)<br>M: LANL2DZ<br>OH: 6-31G* | HF/gen (5d)<br>M: SDD<br>OH: 6-31G* |
|-------------------------------------------------|-------------------------------------------|-----------------------------------------|-------------------------------------|
| $\text{Sb}(\text{H}_2\text{O})_7^{3+} C_s \#3$  | [5+2]                                     | [5+2]                                   | [5+2]                               |
| $\text{Sb}(\text{H}_2\text{O})_7^{3+} C_s \#4$  | -536.3702763                              | [5+2]                                   | [5+2]                               |
| $\text{Sb}(\text{H}_2\text{O})_7^{3+} C_s \#5$  | -536.3792510                              | -536.3459046                            | -536.3690500                        |
| $\text{Sb}(\text{H}_2\text{O})_7^{3+} C_s \#6$  | $C_{2v} \#7$                              | $C_{2v} \#7$                            | $C_{2v} \#7$                        |
| $\text{Sb}(\text{H}_2\text{O})_7^{3+} C_s \#7$  | -536.3727784                              | -536.3396272                            | -536.3632857                        |
| $\text{Sb}(\text{H}_2\text{O})_7^{3+} C_s \#8$  | -536.3676466                              | -536.3343223                            | -536.3582214                        |
| $\text{Sb}(\text{H}_2\text{O})_7^{3+} C_s \#10$ | [5+2]                                     | [5+2]                                   | -536.3632369                        |
| $\text{Sb}(\text{H}_2\text{O})_7^{3+} C_s \#11$ | [5+2]                                     | $C_s \#26$                              | [5+2]                               |
| $\text{Sb}(\text{H}_2\text{O})_7^{3+} C_s \#12$ | $C_s \#8$                                 | $C_s \#8$                               | $C_s \#8$                           |
| $\text{Sb}(\text{H}_2\text{O})_7^{3+} C_s \#13$ | [6+1]                                     | [6+1]                                   | -536.3724480                        |
| $\text{Sb}(\text{H}_2\text{O})_7^{3+} C_s \#14$ | $C_s \#7$                                 | $C_s \#7$                               | $C_s \#7$                           |
| $\text{Sb}(\text{H}_2\text{O})_7^{3+} C_s \#15$ | $C_{2v} \#12$                             | $C_{2v} \#12$                           | $C_{2v} \#12$                       |
| $\text{Sb}(\text{H}_2\text{O})_7^{3+} C_s \#16$ | [5+2]                                     | [5+2]                                   | -536.3616091                        |
| $\text{Sb}(\text{H}_2\text{O})_7^{3+} C_s \#17$ | [5+2]                                     | [5+2]                                   | -536.3551867                        |
| $\text{Sb}(\text{H}_2\text{O})_7^{3+} C_s \#18$ | $C_s \#26$                                | $C_s \#26$                              | $C_s \#26$                          |
| $\text{Sb}(\text{H}_2\text{O})_7^{3+} C_s \#20$ | $C_s \#5$                                 | $C_s \#5$                               | $C_s \#5$                           |
| $\text{Sb}(\text{H}_2\text{O})_7^{3+} C_s \#21$ | [6+1] -536.3733301                        | [6+1] -536.3398453                      | [6+1] -536.3627192                  |
| $\text{Sb}(\text{H}_2\text{O})_7^{3+} C_s \#22$ | $C_s \#7$                                 | $C_s \#7$                               | $C_s \#7$                           |
| $\text{Sb}(\text{H}_2\text{O})_7^{3+} C_s \#23$ | [6+1] -536.3747167                        | [6+1]                                   | -536.3651319                        |
| $\text{Sb}(\text{H}_2\text{O})_7^{3+} C_s \#24$ | [6+1]                                     | -536.3399844                            | $C_s \#10$                          |

|                                                                                                                 |                                                                                                    |                           |                           |
|-----------------------------------------------------------------------------------------------------------------|----------------------------------------------------------------------------------------------------|---------------------------|---------------------------|
| $\text{Sb}(\text{H}_2\text{O})_7^{3+}$ $C_s$ #25                                                                | [6+1] $C_s$ #21                                                                                    | [6+1] $C_s$ #21           | [6+1] $C_s$ #21           |
| $\text{Sb}(\text{H}_2\text{O})_7^{3+}$ $C_s$ #26                                                                | -536.3773702                                                                                       | -536.3441900              | -536.3676973              |
| $\text{Sb}(\text{H}_2\text{O})_7^{3+}$ $C_s$ #27                                                                | [5+2]                                                                                              | [6+1] -536.3449478        | $C_s$ #23                 |
| $\text{Sb}(\text{H}_2\text{O})_7^{3+}$ $C_{2v}$ [5+2]                                                           | <b>-536.3909992</b>                                                                                | <b>-536.3567103</b>       | <b>-536.3783534</b>       |
| $\text{Sb}(\text{H}_2\text{O})_7^{3+}$ $C_{2v}$ #4 [5+2]                                                        |                                                                                                    | -536.3452201              |                           |
| $\text{Sb}(\text{H}_2\text{O})_3(\text{OH})_2^+ + 2\text{H}_3\text{O}^+$<br>$C_{2v}$ #12                        | $\text{Sb}(\text{H}_2\text{O})_2(\text{OH})_2^+ +$<br>$\text{H}_2\text{O} + 2\text{H}_3\text{O}^+$ |                           |                           |
| $\text{Sb}(\text{H}_2\text{O})_2(\text{OH})_2^+ + \text{H}_2\text{O}$<br>$+ 2\text{H}_3\text{O}^+$ $C_{2v}$ #1  | -536.4289658                                                                                       | -536.3896123              | -536.4077793              |
| $\text{Sb}(\text{H}_2\text{O})_2(\text{OH})_2^+ + \text{H}_2\text{O}$<br>$+ 2\text{H}_3\text{O}^+$ $C_{2v}$ #12 | -536.4155443                                                                                       | -536.3762666              | -536.3943485              |
| $\text{Sb}(\text{H}_2\text{O})_7^{3+}$ $C_1$ #2                                                                 | [5+2]                                                                                              | [5+2]                     | [6+1]                     |
| $\text{Sb}(\text{H}_2\text{O})_7^{3+}$ $C_1$ #3                                                                 | [6+1]                                                                                              | [6+1]                     | <b>-536.3726919</b>       |
| $\text{Sb}(\text{H}_2\text{O})_7^{3+}$ $C_1$ #4                                                                 | [6+1]                                                                                              | [5+2]                     | $C_1$ #3                  |
| $\text{Sb}(\text{H}_2\text{O})_7^{3+}$ $C_1$ #7                                                                 | [6+1]                                                                                              | n/a                       | n/a                       |
| $\text{Sb}(\text{H}_2\text{O})_7^{3+}$ $C_1$ #8                                                                 | [6+1]                                                                                              | [6+1]                     | <b>-536.3725069</b>       |
| $\text{Sb}(\text{H}_2\text{O})_7^{3+}$ $C_1$ #10                                                                | [6+1]                                                                                              | [6+1]                     | <b>-536.3727280</b>       |
| $\text{Sb}(\text{H}_2\text{O})_7^{3+}$ $C_1$ #11                                                                | [5+2]                                                                                              | [5+2]                     | $C_1$ #3                  |
| $\text{Sb}(\text{H}_2\text{O})_7^{3+}$ $C_1$ #12                                                                | n/a                                                                                                | n/a                       | $C_1$ #8                  |
| $\text{Sb}(\text{H}_2\text{O})_7^{3+}$ $C_1$ #13                                                                | n/a                                                                                                | n/a                       | $C_1$ #8                  |
| $\text{Sb}(\text{H}_2\text{O})_7^{3+}$ $C_1$ #15                                                                | n/a                                                                                                | n/a                       | $C_1$ #3                  |
| $\text{Sb}(\text{H}_2\text{O})_7^{3+}$ $C_1$ #17                                                                | [5+2] <b>-536.4047803</b>                                                                          | [5+2] <b>-536.3701871</b> | [6+1] <b>-536.3846023</b> |
| $\text{Sb}(\text{H}_2\text{O})_7^{3+}$ $C_1$ #19                                                                | n/a                                                                                                | n/a                       | $C_1$ #3                  |
| $\text{Sb}(\text{H}_2\text{O})_7^{3+}$ $C_1$ #20                                                                | n/a                                                                                                | [6+1]                     | $C_1$ #8                  |
| $\text{Sb}(\text{H}_2\text{O})_7^{3+}$ $C_1$ #21                                                                | [6+1]                                                                                              | [6+1]                     | $C_1$ #8                  |

|                                                    | HF/gen (5d)<br>M: CEP-121G*<br>OH: 6-31G* | HF/gen (5d)<br>M: LANL2DZ<br>OH: 6-31G* | HF/gen (5d)<br>M: SDD<br>OH: 6-31G* |
|----------------------------------------------------|-------------------------------------------|-----------------------------------------|-------------------------------------|
| $\text{Sb}(\text{H}_2\text{O})_8^{3+}$ $D_{4h}$ #1 | -612.3830569                              | -612.3509030                            | -612.3756662                        |
| $\text{Sb}(\text{H}_2\text{O})_8^{3+}$ $D_{4h}$ #2 | -612.3836814                              | -612.3514345                            | -612.3761718                        |
| $\text{Sb}(\text{H}_2\text{O})_8^{3+}$ $D_{4d}$ #1 | -612.4144491                              | -612.3824947                            | -612.4073710                        |
| $\text{Sb}(\text{H}_2\text{O})_8^{3+}$ $D_{4d}$ #2 | -612.4124616                              | -612.3804700                            | -612.4053554                        |
| $\text{Sb}(\text{H}_2\text{O})_8^{3+}$ $S_8$ #1    | -612.4344359                              | <b>-612.4022153</b>                     | <b>-612.4271711</b>                 |
| $\text{Sb}(\text{H}_2\text{O})_8^{3+}$ $S_8$ #2    | $S_8$ #1                                  | $S_8$ #1                                | $S_8$ #1                            |
| $\text{Sb}(\text{H}_2\text{O})_8^{3+}$ $D_4$ #1    | -612.4246659                              | -612.3921789                            | -612.4170549                        |
| $\text{Sb}(\text{H}_2\text{O})_8^{3+}$ $D_4$ #2    | $D_4$ #1                                  | $D_4$ #1                                | $D_4$ #1                            |
| $\text{Sb}(\text{H}_2\text{O})_8^{3+}$ $D_4$ #3    | $D_4$ #1                                  | $D_4$ #1                                | $D_4$ #1                            |
| $\text{Sb}(\text{H}_2\text{O})_8^{3+}$ $D_4$ #4    | $D_4$ #1                                  | $D_4$ #1                                | $D_4$ #1                            |
| $\text{Sb}(\text{H}_2\text{O})_8^{3+}$ $C_{4h}$ #1 | -612.4144706                              | -612.3819718                            | -612.4067968                        |
| $\text{Sb}(\text{H}_2\text{O})_8^{3+}$ $C_{4h}$ #2 | $C_{4h}$ #1                               | $C_{4h}$ #1                             | $C_{4h}$ #1                         |
| $\text{Sb}(\text{H}_2\text{O})_8^{3+}$ $D_{2h}$ #1 | $D_{4h}$ #2                               | $D_{4h}$ #2                             | $D_{4h}$ #2                         |
| $\text{Sb}(\text{H}_2\text{O})_8^{3+}$ $D_{2d}$ #1 | -612.4040018                              | -612.3715332                            | -612.3963100                        |
| $\text{Sb}(\text{H}_2\text{O})_8^{3+}$ $D_{2d}$ #2 | -612.4062445                              | -612.3740590                            | -612.3988966                        |

|                                                   |                           |                    |                    |
|---------------------------------------------------|---------------------------|--------------------|--------------------|
| $\text{Sb}(\text{H}_2\text{O})_8^{3+} D_{2d} \#3$ | $D_{2d} \#1$              | $D_{2d} \#1$       | $D_{2d} \#1$       |
| $\text{Sb}(\text{H}_2\text{O})_8^{3+} D_{2d} \#4$ | -612.4073833              | -612.3749382       | -612.3998682       |
| $\text{Sb}(\text{H}_2\text{O})_8^{3+} D_{2d} \#5$ | -612.4245484              | -612.3920697       | -612.4169245       |
| $\text{Sb}(\text{H}_2\text{O})_8^{3+} C_4 \#1$    | $S_8 \#1$                 | $S_8 \#1$          | $S_8 \#1$          |
| $\text{Sb}(\text{H}_2\text{O})_8^{3+} S_4 \#1$    | $D_{2d} \#5$              | $D_{2d} \#5$       | $D_{2d} \#5$       |
| $\text{Sb}(\text{H}_2\text{O})_8^{3+} S_4 \#2$    | -612.4241453              | -612.3917304       | -612.4166383       |
| $\text{Sb}(\text{H}_2\text{O})_8^{3+} S_4 \#3$    | $S_4 \#2$                 | $S_4 \#2$          | $S_4 \#2$          |
| $\text{Sb}(\text{H}_2\text{O})_8^{3+} S_4 \#4$    | $S_4 \#2$                 | $S_4 \#2$          | $S_4 \#2$          |
| $\text{Sb}(\text{H}_2\text{O})_8^{3+} D_2 \#1$    | -612.4283756              | -612.3961348       | -612.4210916       |
| $\text{Sb}(\text{H}_2\text{O})_8^{3+} D_2 \#2$    | $D_2 \#1$                 | $D_2 \#1$          | $D_2 \#1$          |
| $\text{Sb}(\text{H}_2\text{O})_8^{3+} D_2 \#3$    | $D_2 \#1$                 | $D_2 \#1$          | $D_2 \#1$          |
| $\text{Sb}(\text{H}_2\text{O})_8^{3+} D_2 \#4$    | $D_2 \#1$                 | $D_2 \#1$          | $D_2 \#1$          |
| $\text{Sb}(\text{H}_2\text{O})_8^{3+} D_2 \#5$    | $D_2 \#1$                 | $D_2 \#1$          | $D_2 \#1$          |
| $\text{Sb}(\text{H}_2\text{O})_8^{3+} C_{2v} \#4$ | [6+2] -612.4366304        | [6+2] -612.4025578 | [6+2] -612.4251789 |
| $\text{Sb}(\text{H}_2\text{O})_8^{3+} C_2 \#1$    | [6+2] -612.4534584        | [6+2] -612.4197482 | -612.4212854       |
| $\text{Sb}(\text{H}_2\text{O})_8^{3+} C_2 \#2$    | [6+2] $C_2 \#1$           | $S_8 \#1$          | $S_8 \#1$          |
|                                                   |                           |                    |                    |
| $\text{Sb}(\text{H}_2\text{O})_8^{3+} D_{2h} \#1$ | -612.4122877              | n/a                | n/a                |
| $\text{Sb}(\text{H}_2\text{O})_8^{3+} D_{2h} \#2$ |                           |                    |                    |
| $\text{Sb}(\text{H}_2\text{O})_8^{3+} D_{2h} \#3$ |                           |                    |                    |
| $\text{Sb}(\text{H}_2\text{O})_8^{3+} C_{2h} \#1$ | $D_{2h} \#1$              | n/a                | n/a                |
| $\text{Sb}(\text{H}_2\text{O})_8^{3+} C_{2h} \#2$ | -612.4127033              | n/a                | n/a                |
| $\text{Sb}(\text{H}_2\text{O})_8^{3+} C_{2h} \#3$ | $C_{4h} \#1$              | n/a                | n/a                |
| $\text{Sb}(\text{H}_2\text{O})_8^{3+} C_{2v} \#1$ | $D_{2h} \#1$              | n/a                | n/a                |
| $\text{Sb}(\text{H}_2\text{O})_8^{3+} C_{2v} \#3$ | -612.4130454              | n/a                | n/a                |
| $\text{Sb}(\text{H}_2\text{O})_8^{3+} C_s \#1$    | [5+3] -612.4548945        | n/a                | n/a                |
| $\text{Sb}(\text{H}_2\text{O})_8^{3+} C_s \#2$    | [5+3] -612.4418756        | n/a                | n/a                |
| $\text{Sb}(\text{H}_2\text{O})_8^{3+} C_I \#1$    | [5+3] <b>-612.4637354</b> | n/a                | n/a                |

|                                                   | HF/gen (5d)<br>M: CEP-121G*<br>OH: 6-31G* | HF/gen (5d)<br>M: LANL2DZ<br>OH: 6-31G* | HF/gen (5d)<br>M: SDD<br>OH: 6-31G* |
|---------------------------------------------------|-------------------------------------------|-----------------------------------------|-------------------------------------|
| $\text{Sb}(\text{H}_2\text{O})_9^{3+} D_{3h} \#1$ | -688.4619802                              | -688.4305233                            | -688.4552749                        |
| $\text{Sb}(\text{H}_2\text{O})_9^{3+} D_{3h} \#2$ | -688.4321109                              | -688.4008712                            | -688.4256540                        |
| $\text{Sb}(\text{H}_2\text{O})_9^{3+} D_{3h} \#3$ | -688.4411573                              | -688.4093598                            | -688.4340665                        |
| $\text{Sb}(\text{H}_2\text{O})_9^{3+} D_{3h} \#4$ | -688.4682575                              | -688.4364148                            | -688.4611595                        |
| $\text{Sb}(\text{H}_2\text{O})_9^{3+} D_3 \#1$    | -688.4793795                              | -688.4476761                            | -688.4724195                        |
| $\text{Sb}(\text{H}_2\text{O})_9^{3+} D_3 \#2$    | $D_3 \#1$                                 | $D_3 \#1$                               | $D_3 \#1$                           |
| $\text{Sb}(\text{H}_2\text{O})_9^{3+} D_3 \#3$    | $D_3 \#1$                                 | $D_3 \#1$                               | $D_3 \#1$                           |
| $\text{Sb}(\text{H}_2\text{O})_9^{3+} D_3 \#4$    | $D_3 \#1$                                 | $D_3 \#1$                               | $D_3 \#1$                           |
| $\text{Sb}(\text{H}_2\text{O})_9^{3+} C_{3h} \#1$ | -688.4723612                              | -688.4405385                            | -688.4652606                        |
| $\text{Sb}(\text{H}_2\text{O})_9^{3+} C_{3h} \#2$ | -688.4705815                              | -688.4388521                            | -688.4635939                        |
| $\text{Sb}(\text{H}_2\text{O})_9^{3+} C_{3h} \#3$ | $C_{3h} \#1$                              | $C_{3h} \#1$                            | $C_{3h} \#1$                        |

|                                                      |                     |                     |                     |
|------------------------------------------------------|---------------------|---------------------|---------------------|
| $\text{Sb}(\text{H}_2\text{O})_9^{3+} C_{3h} \#4$    | $C_{3h} \#2$        | $C_{3h} \#2$        | $C_{3h} \#2$        |
| $\text{Sb}(\text{H}_2\text{O})_9^{3+} C_{3v} \#2$    | [6+3] -688.4869972  | [6+3] -688.4528532  | [6+3] -688.4751221  |
| $\text{Sb}(\text{H}_2\text{O})_9^{3+} C_{3v} \#3$    | [6+3] -688.4794232  | [6+3] -688.4455676  | [6+3] -688.4689300  |
| $\text{Sb}(\text{H}_2\text{O})_9^{3+} D_3 [6+3]$     | -688.5003254        | -688.4671713        | -688.4919061        |
| $\text{Sb}(\text{H}_2\text{O})_9^{3+} C_3 \#1$       | [6+3]               | [6+3]               | [6+3]               |
| $\text{Sb}(\text{H}_2\text{O})_9^{3+} C_3 \#2$       | [6+3]               | [6+3]               | [6+3]               |
| $\text{Sb}(\text{H}_2\text{O})_9^{3+} C_3 \#3$       | [6+3]               | [6+3]               | [6+3]               |
| $\text{Sb}(\text{H}_2\text{O})_9^{3+} C_3 \#1 [6+3]$ | <b>-688.4927995</b> | <b>-688.4585890</b> | <b>-688.4810750</b> |
| $\text{Sb}(\text{H}_2\text{O})_9^{3+} C_3 \#2 [6+3]$ | <b>-688.5263099</b> | <b>-688.4915269</b> | <b>-688.5136314</b> |
| $\text{Sb}(\text{H}_2\text{O})_{18}^{3+} T [6+12]$   | -1372.8964389       | -1372.8626407       | -1372.8872522       |

|                                                      | HF/gen (5d)<br>M: CEP-121G*<br>OH: 6-31+G* | HF/gen (5d)<br>M: LANL2DZ<br>OH: 6-31+G* | HF/gen (5d)<br>M: SDD<br>OH: 6-31+G* |
|------------------------------------------------------|--------------------------------------------|------------------------------------------|--------------------------------------|
| $\text{H}_3\text{O}^+ D_{3h}$                        | -76.2853334                                | n/a                                      | n/a                                  |
| $\text{H}_3\text{O}^+ C_{3v}$                        | <b>-76.2885707</b>                         | n/a                                      | n/a                                  |
| $\text{Sb}^{3+} K_h$                                 | <b>-3.4762496</b>                          | <b>-3.4315119</b>                        | <b>-3.4560761</b>                    |
| $\text{SbOH}^{2+} D_{\infty h}$                      | <b>-79.8833686</b>                         | <b>-79.8536754</b>                       | <b>-79.8666718</b>                   |
| $\text{Sb}(\text{H}_2\text{O})^{3+} C_{2v}$          | <b>-79.7114734</b>                         | <b>-79.6883447</b>                       | <b>-79.7083461</b>                   |
| $\text{SbOH}(\text{H}_2\text{O})^{2+} C_s$           | <b>-156.0140947</b>                        | <b>-155.9821609</b>                      | <b>-155.9981521</b>                  |
| $\text{Sb}(\text{H}_2\text{O})_2^{3+} D_{2d}$        | -155.8560438                               | -155.8315056                             | -155.8524543                         |
| $\text{Sb}(\text{H}_2\text{O})_2^{3+} C_s$           | -155.9031058                               | -155.8790365                             | -155.8997482                         |
| $\text{Sb}(\text{H}_2\text{O})_2^{3+} C_2$           | <b>-155.9041047</b>                        | <b>-155.8800516</b>                      | <b>-155.9007546</b>                  |
| $\text{SbOH}(\text{H}_2\text{O})_2^{2+} C_s$         | <b>-232.1241567</b>                        | <b>-232.0894157</b>                      | <b>-232.1067606</b>                  |
| $\text{Sb}(\text{H}_2\text{O})_3^{3+} D_{3h} \#1$    | -232.0014776                               | -231.9771757                             | -231.9995975                         |
| $\text{Sb}(\text{H}_2\text{O})_3^{3+} D_{3h} \#2$    | -232.0033474                               | -231.9788190                             | -232.0015029                         |
| $\text{Sb}(\text{H}_2\text{O})_3^{3+} D_3$           | -232.0045373                               | -231.9801092                             | -232.0026555                         |
| $\text{Sb}(\text{H}_2\text{O})_3^{3+} C_{3v} \#1$    | -232.0627718                               | -232.0332654                             | -232.0545754                         |
| $\text{Sb}(\text{H}_2\text{O})_3^{3+} C_{3v} \#2$    | -232.0564194                               | -232.0275340                             | -232.0491369                         |
| $\text{Sb}(\text{H}_2\text{O})_3^{3+} C_3$           | <b>-232.0671694</b>                        | <b>-232.0379276</b>                      | <b>-232.0592269</b>                  |
| $\text{Sb}(\text{H}_2\text{O})_3^{3+} [2+1] C_{2v}$  | -232.0195161                               | -231.9937104                             | -232.0136147                         |
| $\text{SbOH}(\text{H}_2\text{O})_3^{2+} C_s$         | <b>-308.2020806</b>                        | <b>-308.1664721</b>                      | <b>-308.1844320</b>                  |
| $\text{Sb}(\text{H}_2\text{O})_4^{2+} D_{2d} \#1$    | -308.1311094                               | -308.1028341                             | -308.1264230                         |
| $\text{Sb}(\text{H}_2\text{O})_4^{2+} D_{2d} \#2$    | -308.1309421                               | -308.1025321                             | -308.1261167                         |
| $\text{Sb}(\text{H}_2\text{O})_4^{2+} D_2$           | $D_{2d} \#1$                               | $D_{2d} \#1$                             | $D_{2d} \#1$                         |
| $\text{Sb}(\text{H}_2\text{O})_4^{2+} S_4$           | -308.1326371                               | -308.1040734                             | -308.1276048                         |
| $\text{Sb}(\text{H}_2\text{O})_4^{2+} C_{2v} \#1$    | -308.1696221                               | -308.1385172                             | -308.1602694                         |
| $\text{Sb}(\text{H}_2\text{O})_4^{2+} C_{2v} \#2$    | -308.1694773                               | -308.1380622                             | -308.1597040                         |
| $\text{Sb}(\text{H}_2\text{O})_4^{2+} C_{2v} \#3$    | <b>-308.1781884</b>                        | <b>-308.1466787</b>                      | <b>-308.1681518</b>                  |
| $\text{Sb}(\text{H}_2\text{O})_4^{3+} [3+1] C_s \#1$ | -308.1640916                               | -308.1337213                             | -308.1545302                         |
| $\text{Sb}(\text{H}_2\text{O})_4^{3+} [3+1] C_s \#2$ | -308.1658395                               | -308.1353648                             | -308.1561431                         |
| $\text{SbOH}(\text{H}_2\text{O})_4^{2+} C_s \#1$     | -384.2684479                               | -384.2325542                             | -384.2511386                         |
| $\text{SbOH}(\text{H}_2\text{O})_4^{2+} C_s \#2$     | <b>-384.2692695</b>                        | <b>-384.2334031</b>                      | <b>-384.2519561</b>                  |

|                                                         |                     |                     |                     |
|---------------------------------------------------------|---------------------|---------------------|---------------------|
| $\text{Sb}(\text{H}_2\text{O})_5^{3+} C_{2v} \#1$       | <b>-384.2743271</b> | <b>-384.2419957</b> | <b>-384.2640081</b> |
| $\text{Sb}(\text{H}_2\text{O})_5^{3+} C_{2v} \#2$       | -384.2584291        | -384.2265097        | -384.2488065        |
| $\text{Sb}(\text{H}_2\text{O})_5^{3+} C_{2v} \#3$       | -384.2618900        | -384.2296991        | -384.2517624        |
| $\text{Sb}(\text{H}_2\text{O})_5^{3+} C_{2v} \#4$       | -384.2597493        | -384.2277385        | -384.2499996        |
| $\text{Sb}(\text{H}_2\text{O})_5^{3+} [4+1] C_{2v} \#1$ | <b>-384.2642528</b> | -384.2319209        | -384.2531118        |
| $\text{Sb}(\text{H}_2\text{O})_5^{3+} [4+1] C_{2v} \#2$ | -384.2618607        | -384.2296131        | -384.2508352        |
| $\text{Sb}(\text{H}_2\text{O})_6^{3+} T_h$              | -460.3339467        | -460.3012633        | -460.3250792        |
| $\text{Sb}(\text{H}_2\text{O})_6^{3+} C_3$              | <b>-460.3472925</b> | <b>-460.3151868</b> | <b>-460.3375715</b> |
| $\text{Sb}(\text{H}_2\text{O})_6^{3+} [5+1] C_s \#1$    | -460.3504723        | -460.3175193        | -460.3391413        |
| $\text{Sb}(\text{H}_2\text{O})_6^{3+} [5+1] C_s \#2$    | <b>-460.3567716</b> | <b>-460.3237836</b> | <b>-460.3453798</b> |

|                                                    | HF/gen (5d)<br>M: CEP-121G*<br>OH: 6-31+G* | HF/gen (5d)<br>M: LANL2DZ<br>OH: 6-31+G* | HF/gen (5d)<br>M: SDD<br>OH: 6-31+G* |
|----------------------------------------------------|--------------------------------------------|------------------------------------------|--------------------------------------|
| $\text{Sb}(\text{H}_2\text{O})_7^{3+} C_{2v} \#1$  | [5+2]                                      | [5+2]                                    | [5+2]                                |
| $\text{Sb}(\text{H}_2\text{O})_7^{3+} C_{2v} \#2$  | [5+2]                                      | [5+2]                                    | [5+2]                                |
| $\text{Sb}(\text{H}_2\text{O})_7^{3+} C_{2v} \#3$  | -536.3951651                               | -536.3632715                             | -536.3864362                         |
| $\text{Sb}(\text{H}_2\text{O})_7^{3+} C_{2v} \#4$  | [5+2]                                      | [5+2]                                    | [5+2]                                |
| $\text{Sb}(\text{H}_2\text{O})_7^{3+} C_{2v} \#5$  | -536.3782585                               | -536.3463053                             | -536.3697942                         |
| $\text{Sb}(\text{H}_2\text{O})_7^{3+} C_{2v} \#6$  | -536.3864893                               | -536.3543396                             | -536.3779777                         |
| $\text{Sb}(\text{H}_2\text{O})_7^{3+} C_{2v} \#7$  | -536.3813578                               | -536.3491303                             | -536.3722130                         |
| $\text{Sb}(\text{H}_2\text{O})_7^{3+} C_{2v} \#8$  | -536.3967005                               | -536.3643375                             | -536.3874837                         |
| $\text{Sb}(\text{H}_2\text{O})_7^{3+} C_{2v} \#9$  | -536.3964442                               | -536.3648741                             | -536.3879856                         |
| $\text{Sb}(\text{H}_2\text{O})_7^{3+} C_{2v} \#10$ | -536.3837371                               | -536.3521750                             | -536.3754627                         |
| $\text{Sb}(\text{H}_2\text{O})_7^{3+} C_{2v} \#11$ | -536.3928380                               | -536.3607866                             | -536.3840101                         |
| $\text{Sb}(\text{H}_2\text{O})_7^{3+} C_{2v} \#12$ | -536.3847920                               | -536.3529838                             | -536.3761099                         |
| $\text{Sb}(\text{H}_2\text{O})_7^{3+} C_{2v} \#13$ | -536.3934584                               | -536.3614495                             | -536.3846254                         |
| $\text{Sb}(\text{H}_2\text{O})_7^{3+} C_{2v} \#14$ | -536.3944141                               | -536.3627007                             | -536.3860605                         |
| $\text{Sb}(\text{H}_2\text{O})_7^{3+} C_{2v} \#15$ | -536.3970616                               | -536.3646313                             | -536.3878003                         |
| $\text{Sb}(\text{H}_2\text{O})_7^{3+} C_{2v} \#16$ | -536.4014611                               | -536.3694578                             | -536.3930181                         |
| $\text{Sb}(\text{H}_2\text{O})_7^{3+} C_2 \#3$     | $C_2 \#11$                                 | $C_2 \#11$                               | $C_2 \#11$                           |
| $\text{Sb}(\text{H}_2\text{O})_7^{3+} C_2 \#5$     | -536.4008304                               | -536.3690557                             | -536.3924571                         |
| $\text{Sb}(\text{H}_2\text{O})_7^{3+} C_2 \#6$     | [5+2]                                      | [5+2]                                    | [5+2]                                |
| $\text{Sb}(\text{H}_2\text{O})_7^{3+} C_2 \#7$     | [5+2]                                      | $C_2 \#13$                               | <b>[5+2] -536.4052545</b>            |
| $\text{Sb}(\text{H}_2\text{O})_7^{3+} C_2 \#8$     | [5+2]                                      | [5+2]                                    | [5+2]                                |
| $\text{Sb}(\text{H}_2\text{O})_7^{3+} C_2 \#9$     | [5+2]                                      | [5+2]                                    | [5+2]                                |
| $\text{Sb}(\text{H}_2\text{O})_7^{3+} C_2 \#10$    | [5+2]                                      | [5+2]                                    | [5+2]                                |
| $\text{Sb}(\text{H}_2\text{O})_7^{3+} C_2 \#11$    | -536.4012399                               | -536.3694346                             | -536.3926353                         |
| $\text{Sb}(\text{H}_2\text{O})_7^{3+} C_2 \#12$    | [5+2]                                      | [5+2]                                    | [5+2]                                |
| $\text{Sb}(\text{H}_2\text{O})_7^{3+} C_2 \#13$    | [5+2]                                      | -536.3694509                             | <b>[5+2] -536.4052545</b>            |
| $\text{Sb}(\text{H}_2\text{O})_7^{3+} C_2 \#14$    | <b>[5+2] -536.4166033</b>                  | $C_2 \#13$                               | [5+2]                                |
| $\text{Sb}(\text{H}_2\text{O})_7^{3+} C_2 \#15$    | [5+2]                                      | $C_2 \#13$                               | [5+2]                                |
| $\text{Sb}(\text{H}_2\text{O})_7^{3+} C_2 \#16$    | [5+2]                                      | [5+2]                                    | [5+2]                                |

|                                                                                                                                            | HF/gen (5d)<br>M: CEP-121G*<br>OH: 6-31+G* | HF/gen (5d)<br>M: LANL2DZ<br>OH: 6-31+G* | HF/gen (5d)<br>M: SDD<br>OH: 6-31+G* |
|--------------------------------------------------------------------------------------------------------------------------------------------|--------------------------------------------|------------------------------------------|--------------------------------------|
| Sb(H <sub>2</sub> O) <sub>7</sub> <sup>3+</sup> C <sub>s</sub> #3                                                                          | [5+2]                                      | [6+1]                                    | [6+1] -536.4057121                   |
| Sb(H <sub>2</sub> O) <sub>7</sub> <sup>3+</sup> C <sub>s</sub> #4                                                                          | [5+2]                                      | [5+2]                                    | [5+2]                                |
| Sb(H <sub>2</sub> O) <sub>7</sub> <sup>3+</sup> C <sub>s</sub> #5                                                                          | -536.4056864                               | -536.3737854                             | -536.3963769                         |
| Sb(H <sub>2</sub> O) <sub>7</sub> <sup>3+</sup> C <sub>s</sub> #6                                                                          | C <sub>2v</sub> #7                         | C <sub>2v</sub> #7                       | C <sub>2v</sub> #7                   |
| Sb(H <sub>2</sub> O) <sub>7</sub> <sup>3+</sup> C <sub>s</sub> #7                                                                          | -536.3995196                               | -536.3687777                             | -536.3919877                         |
| Sb(H <sub>2</sub> O) <sub>7</sub> <sup>3+</sup> C <sub>s</sub> #8                                                                          | -536.3967035                               | -536.3644693                             | -536.3875698                         |
| Sb(H <sub>2</sub> O) <sub>7</sub> <sup>3+</sup> C <sub>s</sub> #10                                                                         | [5+2]                                      | -536.3688258                             | [6+1]                                |
| Sb(H <sub>2</sub> O) <sub>7</sub> <sup>3+</sup> C <sub>s</sub> #11                                                                         | C <sub>s</sub> #26                         | C <sub>s</sub> #26                       | C <sub>s</sub> #26                   |
| Sb(H <sub>2</sub> O) <sub>7</sub> <sup>3+</sup> C <sub>s</sub> #12                                                                         | C <sub>s</sub> #8                          | C <sub>s</sub> #8                        | C <sub>s</sub> #8                    |
| Sb(H <sub>2</sub> O) <sub>7</sub> <sup>3+</sup> C <sub>s</sub> #13                                                                         | <b>-536.4100518</b>                        | -536.3780360                             | -536.4005494                         |
| Sb(H <sub>2</sub> O) <sub>7</sub> <sup>3+</sup> C <sub>s</sub> #14                                                                         | C <sub>s</sub> #7                          | -536.3675953                             | C <sub>s</sub> #7                    |
| Sb(H <sub>2</sub> O) <sub>7</sub> <sup>3+</sup> C <sub>s</sub> #15                                                                         | C <sub>2v</sub> #12                        | C <sub>2v</sub> #12                      | C <sub>2v</sub> #12                  |
| Sb(H <sub>2</sub> O) <sub>7</sub> <sup>3+</sup> C <sub>s</sub> #16                                                                         | C <sub>s</sub> #24                         | C <sub>s</sub> #10                       | C <sub>s</sub> #24                   |
| Sb(H <sub>2</sub> O) <sub>7</sub> <sup>3+</sup> C <sub>s</sub> #17                                                                         | -536.3951915                               | -536.3631649                             | -536.3864537                         |
| Sb(H <sub>2</sub> O) <sub>7</sub> <sup>3+</sup> C <sub>s</sub> #18                                                                         | C <sub>s</sub> #26                         | C <sub>s</sub> #26                       | C <sub>s</sub> #26                   |
| Sb(H <sub>2</sub> O) <sub>7</sub> <sup>3+</sup> C <sub>s</sub> #20                                                                         | C <sub>s</sub> #5                          | C <sub>s</sub> #5                        | C <sub>s</sub> #5                    |
| Sb(H <sub>2</sub> O) <sub>7</sub> <sup>3+</sup> C <sub>s</sub> #21                                                                         | [6+1] -536.4014856                         | [6+1] -536.3691532                       | [6+1] -536.3916869                   |
| Sb(H <sub>2</sub> O) <sub>7</sub> <sup>3+</sup> C <sub>s</sub> #22                                                                         | -536.4002540                               | C <sub>s</sub> #7                        | C <sub>s</sub> #7                    |
| Sb(H <sub>2</sub> O) <sub>7</sub> <sup>3+</sup> C <sub>s</sub> #23                                                                         | -536.4045862                               | -536.3726801                             | -536.3957202                         |
| Sb(H <sub>2</sub> O) <sub>7</sub> <sup>3+</sup> C <sub>s</sub> #24                                                                         | -536.4010241                               | C <sub>s</sub> #10                       | -536.3917842                         |
| Sb(H <sub>2</sub> O) <sub>7</sub> <sup>3+</sup> C <sub>s</sub> #25                                                                         | [6+1] C <sub>s</sub> #21                   | [6+1] C <sub>s</sub> #21                 | [6+1] C <sub>s</sub> #21             |
| Sb(H <sub>2</sub> O) <sub>7</sub> <sup>3+</sup> C <sub>s</sub> #26                                                                         | -536.4056095                               | -536.3736117                             | -536.3964629                         |
| Sb(H <sub>2</sub> O) <sub>7</sub> <sup>3+</sup> C <sub>s</sub> #27                                                                         | C <sub>s</sub> #23                         | C <sub>s</sub> #23                       | C <sub>s</sub> #23                   |
| Sb(H <sub>2</sub> O) <sub>7</sub> <sup>3+</sup> C <sub>2v</sub> #2 [5+2]                                                                   | -536.4045515                               | [5+2]                                    |                                      |
| Sb(H <sub>2</sub> O) <sub>7</sub> <sup>3+</sup> C <sub>2v</sub> [5+2]                                                                      | <b>-536.4166050</b>                        | <b>-536.3836789</b>                      | <b>-536.4052556</b>                  |
| Sb(H <sub>2</sub> O) <sub>2</sub> (OH) <sub>2</sub> <sup>+</sup> + H <sub>2</sub> O<br>+2H <sub>3</sub> O <sup>+</sup> C <sub>2v</sub> #1  | -536.4542215                               | -536.4168223                             | -536.4348544                         |
| Sb(H <sub>2</sub> O) <sub>2</sub> (OH) <sub>2</sub> <sup>+</sup> + H <sub>2</sub> O<br>+2H <sub>3</sub> O <sup>+</sup> C <sub>2v</sub> #12 | -536.4419365                               | -536.4042325                             | -536.4220360                         |
| Sb(H <sub>2</sub> O) <sub>7</sub> <sup>3+</sup> C <sub>1</sub> #1                                                                          | [6+1]                                      | C <sub>1</sub> #3                        | C <sub>1</sub> #3                    |
| Sb(H <sub>2</sub> O) <sub>7</sub> <sup>3+</sup> C <sub>1</sub> #3                                                                          | [5+2]                                      | <b>-536.3784950</b>                      | <b>-536.4011801</b>                  |
| Sb(H <sub>2</sub> O) <sub>7</sub> <sup>3+</sup> C <sub>1</sub> #4                                                                          | n/a                                        | C <sub>1</sub> #3                        | n/a                                  |
| Sb(H <sub>2</sub> O) <sub>7</sub> <sup>3+</sup> C <sub>1</sub> #8                                                                          | <b>-536.4097018</b>                        | <b>-536.3776262</b>                      | <b>-536.4000363</b>                  |
| Sb(H <sub>2</sub> O) <sub>7</sub> <sup>3+</sup> C <sub>1</sub> #10                                                                         | [6+1]                                      | C <sub>1</sub> #3                        | C <sub>1</sub> #3                    |
| Sb(H <sub>2</sub> O) <sub>7</sub> <sup>3+</sup> C <sub>1</sub> #11                                                                         | [6+1]                                      | C <sub>1</sub> #3                        | C <sub>1</sub> #3                    |
| Sb(H <sub>2</sub> O) <sub>7</sub> <sup>3+</sup> C <sub>1</sub> #12                                                                         | n/a                                        | C <sub>1</sub> #8                        | n/a                                  |
| Sb(H <sub>2</sub> O) <sub>7</sub> <sup>3+</sup> C <sub>1</sub> #13                                                                         | <b>-536.4100521</b>                        | C <sub>1</sub> #3                        | C <sub>1</sub> #3                    |
| Sb(H <sub>2</sub> O) <sub>7</sub> <sup>3+</sup> C <sub>1</sub> #14                                                                         | n/a                                        | C <sub>1</sub> #3                        | n/a                                  |
| Sb(H <sub>2</sub> O) <sub>7</sub> <sup>3+</sup> C <sub>1</sub> #15                                                                         | [6+1]                                      | C <sub>1</sub> #3                        | C <sub>1</sub> #3                    |
| Sb(H <sub>2</sub> O) <sub>7</sub> <sup>3+</sup> C <sub>1</sub> #17                                                                         | [5+2]                                      | [6+1] <b>-536.3891165</b>                | [6+1] <b>-536.4110555</b>            |
| Sb(H <sub>2</sub> O) <sub>7</sub> <sup>3+</sup> C <sub>1</sub> #18                                                                         | C <sub>1</sub> #8                          | n/a                                      | n/a                                  |
| Sb(H <sub>2</sub> O) <sub>7</sub> <sup>3+</sup> C <sub>1</sub> #19                                                                         | [6+1]                                      | C <sub>1</sub> #3                        | C <sub>1</sub> #3                    |

|                                                  |       |          |          |
|--------------------------------------------------|-------|----------|----------|
| $\text{Sb}(\text{H}_2\text{O})_7^{3+}$ $C_1$ #20 | [6+1] | n/a      | [6+1]    |
| $\text{Sb}(\text{H}_2\text{O})_7^{3+}$ $C_1$ #21 | [6+1] | $C_1$ #3 | $C_1$ #3 |

|                                                    | HF/gen (5d)<br>M: CEP-121G*<br>OH: 6-31+G* | HF/gen (5d)<br>M: LANL2DZ<br>OH: 6-31+G* | HF/gen (5d)<br>M: SDD<br>OH: 6-31+G* |
|----------------------------------------------------|--------------------------------------------|------------------------------------------|--------------------------------------|
| $\text{Sb}(\text{H}_2\text{O})_8^{3+}$ $D_{4h}$ #1 | -612.4161642                               | -612.3859046                             | -612.4094348                         |
| $\text{Sb}(\text{H}_2\text{O})_8^{3+}$ $D_{4h}$ #2 | -612.4166713                               | -612.3864364                             | -612.4100136                         |
| $\text{Sb}(\text{H}_2\text{O})_8^{3+}$ $D_{4d}$ #1 | -612.4476275                               | -612.4160099                             | -612.4393876                         |
| $\text{Sb}(\text{H}_2\text{O})_8^{3+}$ $D_{4d}$ #2 | -612.4467945                               | -612.4153990                             | -612.4388263                         |
| $\text{Sb}(\text{H}_2\text{O})_8^{3+}$ $S_8$ #1    | -612.4703005                               | <b>-612.4384028</b>                      | <b>-612.4618398</b>                  |
| $\text{Sb}(\text{H}_2\text{O})_8^{3+}$ $S_8$ #2    | $S_8$ #1                                   | $S_8$ #1                                 | $S_8$ #1                             |
| $\text{Sb}(\text{H}_2\text{O})_8^{3+}$ $D_4$ #1    | -612.4604353                               | -612.4291669                             | -612.4527303                         |
| $\text{Sb}(\text{H}_2\text{O})_8^{3+}$ $D_4$ #2    | $D_4$ #1                                   | $D_4$ #1                                 | $D_4$ #1                             |
| $\text{Sb}(\text{H}_2\text{O})_8^{3+}$ $D_4$ #3    | $D_4$ #1                                   | $D_4$ #1                                 | $D_4$ #1                             |
| $\text{Sb}(\text{H}_2\text{O})_8^{3+}$ $D_4$ #4    | $D_4$ #1                                   | $D_4$ #1                                 | $D_4$ #1                             |
| $\text{Sb}(\text{H}_2\text{O})_8^{3+}$ $C_{4h}$ #1 | -612.4493168                               | -612.4183706                             | -612.4418829                         |
| $\text{Sb}(\text{H}_2\text{O})_8^{3+}$ $C_{4h}$ #2 | $C_{4h}$ #1                                | $C_{4h}$ #1                              | $C_{4h}$ #1                          |
| $\text{Sb}(\text{H}_2\text{O})_8^{3+}$ $D_{2h}$ #1 | $D_{4h}$ #2                                | $D_{4h}$ #2                              | $D_{4h}$ #2                          |
| $\text{Sb}(\text{H}_2\text{O})_8^{3+}$ $D_{2d}$ #1 | -612.4383633                               | -612.4077832                             | -612.4314118                         |
| $\text{Sb}(\text{H}_2\text{O})_8^{3+}$ $D_{2d}$ #2 | -612.4415611                               | -612.4104752                             | -612.4340180                         |
| $\text{Sb}(\text{H}_2\text{O})_8^{3+}$ $D_{2d}$ #3 | $D_{2d}$ #1                                | $D_{2d}$ #1                              | $D_{2d}$ #1                          |
| $\text{Sb}(\text{H}_2\text{O})_8^{3+}$ $D_{2d}$ #4 | -612.4404787                               | -612.4090142                             | -612.4326103                         |
| $\text{Sb}(\text{H}_2\text{O})_8^{3+}$ $D_{2d}$ #5 | -612.4604405                               | -612.4292609                             | -612.4528423                         |
| $\text{Sb}(\text{H}_2\text{O})_8^{3+}$ $C_4$ #1    | $S_8$ #1                                   | $S_8$ #1                                 | $S_8$ #1                             |
| $\text{Sb}(\text{H}_2\text{O})_8^{3+}$ $S_4$ #1    | $D_{2d}$ #5                                | $D_{2d}$ #5                              | $D_{2d}$ #5                          |
| $\text{Sb}(\text{H}_2\text{O})_8^{3+}$ $S_4$ #2    | -612.4593490                               | -612.4276253                             | -612.4511624                         |
| $\text{Sb}(\text{H}_2\text{O})_8^{3+}$ $S_4$ #3    | $S_4$ #2                                   | $S_4$ #2                                 | $S_4$ #2                             |
| $\text{Sb}(\text{H}_2\text{O})_8^{3+}$ $S_4$ #4    | $S_4$ #2                                   | $S_4$ #2                                 | $S_4$ #2                             |
| $\text{Sb}(\text{H}_2\text{O})_8^{3+}$ $D_2$ #1    | -612.4635688                               | -612.4318345                             | -612.4553840                         |
| $\text{Sb}(\text{H}_2\text{O})_8^{3+}$ $D_2$ #2    | $D_2$ #1                                   | $D_2$ #1                                 | $D_2$ #1                             |
| $\text{Sb}(\text{H}_2\text{O})_8^{3+}$ $D_2$ #3    | $D_2$ #1                                   | $D_2$ #1                                 | $D_2$ #1                             |
| $\text{Sb}(\text{H}_2\text{O})_8^{3+}$ $D_2$ #4    | $D_2$ #1                                   | $D_2$ #1                                 | $D_2$ #1                             |
| $\text{Sb}(\text{H}_2\text{O})_8^{3+}$ $D_2$ #5    | $D_2$ #1                                   | $D_2$ #1                                 | $D_2$ #1                             |
| $\text{Sb}(\text{H}_2\text{O})_8^{3+}$ $C_{2v}$ #2 | -612.4418227                               | -612.4104843                             | n/a                                  |
| $\text{Sb}(\text{H}_2\text{O})_8^{3+}$ $C_{2v}$ #4 | -612.4691752                               | -612.4367029                             | n/a                                  |
| $\text{Sb}(\text{H}_2\text{O})_8^{3+}$ $C_2$ #1    | -612.4637969                               | -612.4321131                             | -612.4555685                         |
| $\text{Sb}(\text{H}_2\text{O})_8^{3+}$ $C_2$ #2    | $S_8$ #1                                   | $S_8$ #1                                 | $S_8$ #1                             |
|                                                    |                                            |                                          |                                      |
| $\text{Sb}(\text{H}_2\text{O})_8^{3+}$ $D_{2h}$ #1 | -612.4475060                               | n/a                                      | n/a                                  |
| $\text{Sb}(\text{H}_2\text{O})_8^{3+}$ $D_{2h}$ #2 |                                            |                                          |                                      |
| $\text{Sb}(\text{H}_2\text{O})_8^{3+}$ $D_{2h}$ #3 |                                            |                                          |                                      |
| $\text{Sb}(\text{H}_2\text{O})_8^{3+}$ $C_{2h}$ #1 | $D_{2h}$ #1                                | n/a                                      | n/a                                  |

|                                                   |                           |     |     |
|---------------------------------------------------|---------------------------|-----|-----|
| $\text{Sb}(\text{H}_2\text{O})_8^{3+} C_{2h} \#2$ | -612.4480251              | n/a | n/a |
| $\text{Sb}(\text{H}_2\text{O})_8^{3+} C_{2h} \#3$ | $C_{4h} \#1$              | n/a | n/a |
| $\text{Sb}(\text{H}_2\text{O})_8^{3+} C_{2v} \#1$ | $D_{2h} \#1$              | n/a | n/a |
| $\text{Sb}(\text{H}_2\text{O})_8^{3+} C_{2v} \#3$ | -612.4481269              | n/a | n/a |
| $\text{Sb}(\text{H}_2\text{O})_8^{3+} C_s \#1$    | [5+3] -612.4837968        | n/a | n/a |
| $\text{Sb}(\text{H}_2\text{O})_8^{3+} C_s \#2$    | [5+3] -612.4721481        | n/a | n/a |
| $\text{Sb}(\text{H}_2\text{O})_8^{3+} C_2 \#1$    | [6+2] <b>-612.4829888</b> | n/a | n/a |
| $\text{Sb}(\text{H}_2\text{O})_8^{3+} C_1 \#1$    | <b>-612.4703035</b>       | n/a | n/a |

|                                                      | HF/gen (5d)<br>M: CEP-121G*<br>OH: 6-31+G* | HF/gen (5d)<br>M: LANL2DZ<br>OH: 6-31+G* | HF/gen (5d)<br>M: SDD<br>OH: 6-31+G* |
|------------------------------------------------------|--------------------------------------------|------------------------------------------|--------------------------------------|
| $\text{Sb}(\text{H}_2\text{O})_9^{3+} D_{3h} \#1$    | -688.4994750                               | -688.4680299                             | -688.4912818                         |
| $\text{Sb}(\text{H}_2\text{O})_9^{3+} D_{3h} \#2$    | -688.4685715                               | -688.4371764                             | -688.4604079                         |
| $\text{Sb}(\text{H}_2\text{O})_9^{3+} D_{3h} \#3$    | -688.4809815                               | -688.4492320                             | -688.4724483                         |
| $\text{Sb}(\text{H}_2\text{O})_9^{3+} D_{3h} \#4$    | -688.5072060                               | -688.4758140                             | -688.4991693                         |
| $\text{Sb}(\text{H}_2\text{O})_9^{3+} D_3 \#1$       | -688.5195142                               | -688.4878249                             | -688.5110906                         |
| $\text{Sb}(\text{H}_2\text{O})_9^{3+} D_3 \#2$       | $D_3 \#1$                                  | $D_3 \#1$                                | $D_3 \#1$                            |
| $\text{Sb}(\text{H}_2\text{O})_9^{3+} D_3 \#3$       | $D_3 \#1$                                  | $D_3 \#1$                                | $D_3 \#1$                            |
| $\text{Sb}(\text{H}_2\text{O})_9^{3+} D_3 \#4$       | $D_3 \#1$                                  | $D_3 \#1$                                | $D_3 \#1$                            |
| $\text{Sb}(\text{H}_2\text{O})_9^{3+} C_{3h} \#1$    | -688.5110529                               | -688.4798305                             | -688.5031858                         |
| $\text{Sb}(\text{H}_2\text{O})_9^{3+} C_{3h} \#2$    | -688.5097945                               | -688.4783259                             | -688.5016197                         |
| $\text{Sb}(\text{H}_2\text{O})_9^{3+} C_{3h} \#3$    | $C_{3h} \#1$                               | $C_{3h} \#1$                             | $C_{3h} \#1$                         |
| $\text{Sb}(\text{H}_2\text{O})_9^{3+} C_{3h} \#4$    | $C_{3h} \#2$                               | $C_{3h} \#2$                             | $C_{3h} \#2$                         |
| $\text{Sb}(\text{H}_2\text{O})_9^{3+} C_{3v} \#1$    | -688.5003033                               | -688.4683336                             | -688.4913337                         |
| $\text{Sb}(\text{H}_2\text{O})_9^{3+} C_{3v} \#2$    | [6+3] -688.5230584                         | [6+3] -688.4901332                       | [6+3]                                |
| $\text{Sb}(\text{H}_2\text{O})_9^{3+} C_{3v} \#3$    | [6+3] -688.5137367                         | [6+3] -688.4822086                       | [6+3] -688.5048172                   |
| $\text{Sb}(\text{H}_2\text{O})_9^{3+} C_3 \#1$       | [6+3]                                      | [6+3]                                    | $D_3 \#1$                            |
| $\text{Sb}(\text{H}_2\text{O})_9^{3+} C_3 \#2$       | [6+3]                                      | [6+3]                                    | [6+3]                                |
| $\text{Sb}(\text{H}_2\text{O})_9^{3+} C_3 \#3$       | [6+3]                                      | [6+3]                                    | [6+3]                                |
| $\text{Sb}(\text{H}_2\text{O})_9^{3+} C_3 \#4$       | [6+3]                                      | [6+3]                                    | $D_3 \#1$                            |
| $\text{Sb}(\text{H}_2\text{O})_9^{3+} C_3 \#1$ [6+3] | <b>-688.5284002</b>                        | <b>688.4961909</b>                       | <b>-688.5185892</b>                  |
| $\text{Sb}(\text{H}_2\text{O})_9^{3+} C_3 \#2$ [6+3] | <b>-688.5591671</b>                        | <b>-688.5261823</b>                      | <b>-688.5480844</b>                  |
| $\text{Sb}(\text{H}_2\text{O})_9^{3+} D_3$ [6+3]     | -688.5398128                               | -688.5082779                             | -688.5320403                         |



Figure S1: Some stationary point (non-minimum) energy structures of aquaantimony(III).

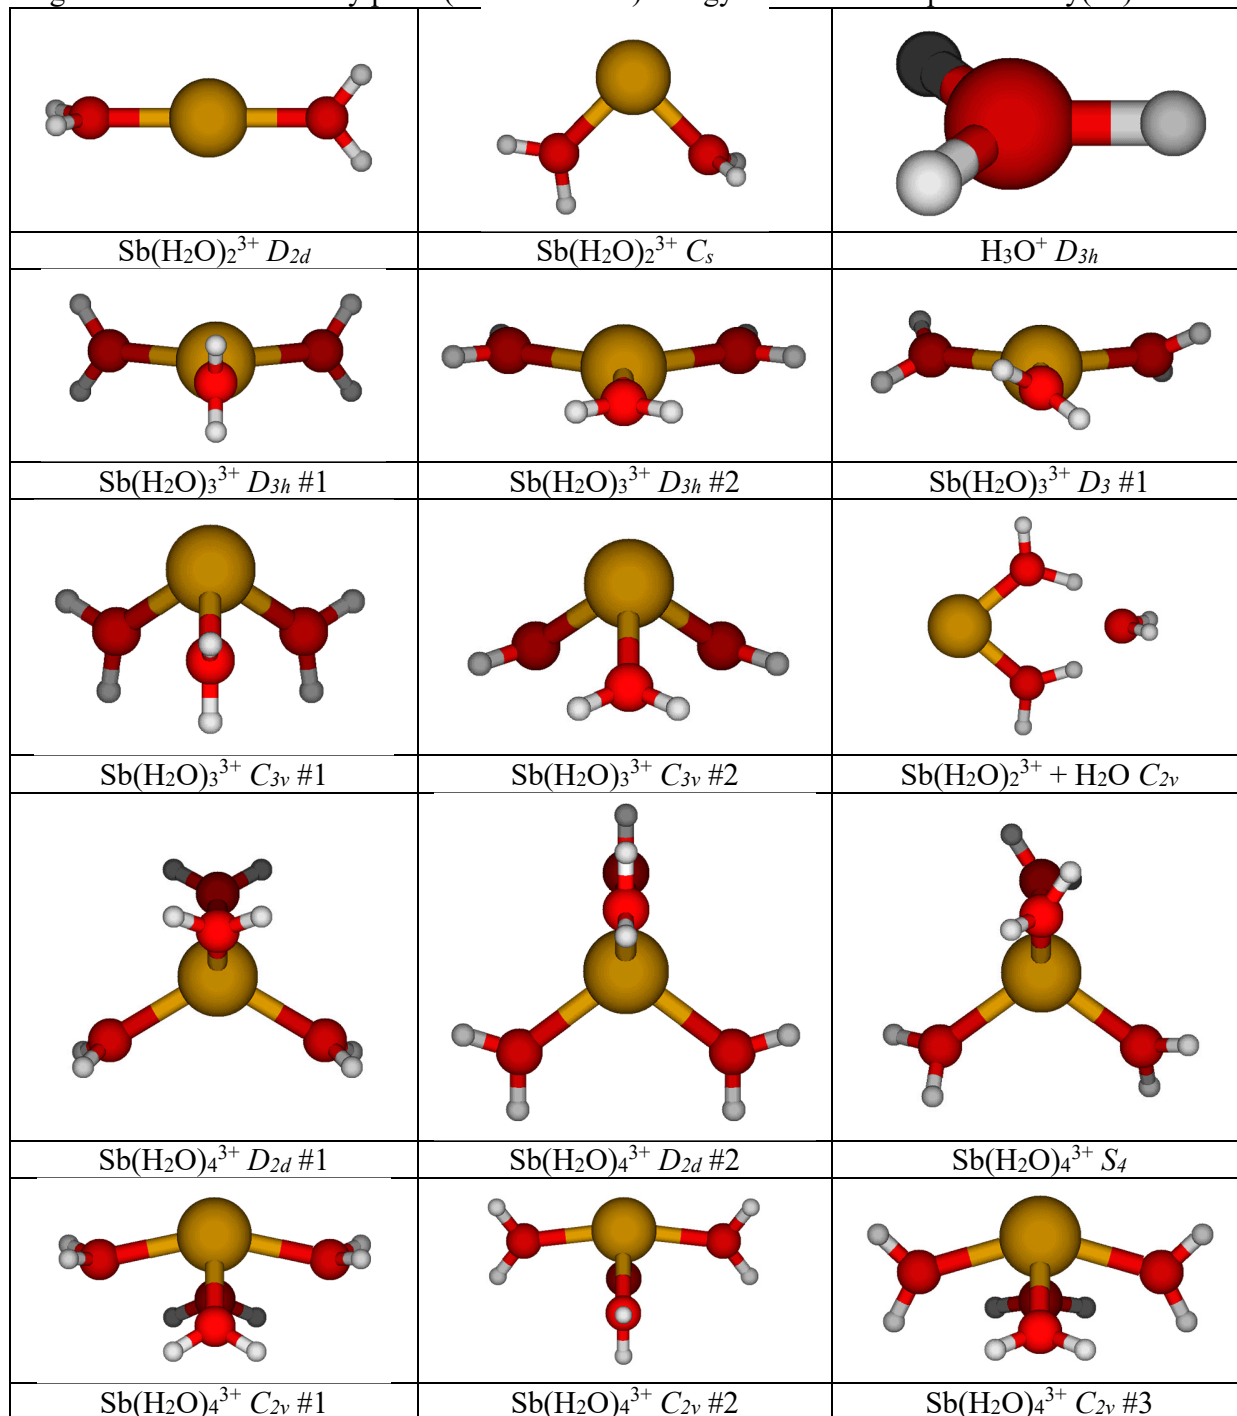

|                                                                         |                                                                         |                                                                      |
|-------------------------------------------------------------------------|-------------------------------------------------------------------------|----------------------------------------------------------------------|
|                                                                         |                                                                         |                                                                      |
| $\text{Sb}(\text{H}_2\text{O})_3^{3+} + \text{H}_2\text{O } C_s \#1$    | $\text{Sb}(\text{H}_2\text{O})_3^{3+} + \text{H}_2\text{O } C_s \#2$    | $\text{SbOH}(\text{H}_2\text{O})_4^{2+} C_s \#1$                     |
|                                                                         |                                                                         |                                                                      |
| $\text{Sb}(\text{H}_2\text{O})_5^{3+} C_{2v} \#2$                       | $\text{Sb}(\text{H}_2\text{O})_5^{3+} C_{2v} \#3$                       | $\text{Sb}(\text{H}_2\text{O})_5^{3+} C_{2v} \#4$                    |
|                                                                         |                                                                         |                                                                      |
| $\text{Sb}(\text{H}_2\text{O})_4^{3+} + \text{H}_2\text{O } C_{2v} \#1$ | $\text{Sb}(\text{H}_2\text{O})_4^{3+} + \text{H}_2\text{O } C_{2v} \#2$ | $\text{Sb}(\text{H}_2\text{O})_4^{3+} + \text{H}_2\text{O } C_2 \#1$ |
|                                                                         |                                                                         |                                                                      |
|                                                                         | $\text{Sb}(\text{H}_2\text{O})_6^{3+} T_h$                              | $\text{Sb}(\text{H}_2\text{O})_5^{3+} + \text{H}_2\text{O } C_s \#1$ |

|                                                                     |                                                                     |                                                                     |
|---------------------------------------------------------------------|---------------------------------------------------------------------|---------------------------------------------------------------------|
|                                                                     |                                                                     |                                                                     |
| $\text{Sb}(\text{H}_2\text{O})_7^{3+} \text{ } C_{2v} \text{ \#1}$  | $\text{Sb}(\text{H}_2\text{O})_7^{3+} \text{ } C_{2v} \text{ \#2}$  | $\text{Sb}(\text{H}_2\text{O})_7^{3+} \text{ } C_{2v} \text{ \#3}$  |
|                                                                     |                                                                     |                                                                     |
| $\text{Sb}(\text{H}_2\text{O})_7^{3+} \text{ } C_{2v} \text{ \#5}$  | $\text{Sb}(\text{H}_2\text{O})_7^{3+} \text{ } C_{2v} \text{ \#6}$  | $\text{Sb}(\text{H}_2\text{O})_7^{3+} \text{ } C_{2v} \text{ \#7}$  |
|                                                                     |                                                                     |                                                                     |
| $\text{Sb}(\text{H}_2\text{O})_7^{3+} \text{ } C_{2v} \text{ \#8}$  | $\text{Sb}(\text{H}_2\text{O})_7^{3+} \text{ } C_{2v} \text{ \#9}$  | $\text{Sb}(\text{H}_2\text{O})_7^{3+} \text{ } C_{2v} \text{ \#10}$ |
|                                                                     |                                                                     |                                                                     |
| $\text{Sb}(\text{H}_2\text{O})_7^{3+} \text{ } C_{2v} \text{ \#11}$ | $\text{Sb}(\text{H}_2\text{O})_7^{3+} \text{ } C_{2v} \text{ \#12}$ | $\text{Sb}(\text{H}_2\text{O})_7^{3+} \text{ } C_{2v} \text{ \#13}$ |

|                                                                                     |                                                                                     |                                                                                       |
|-------------------------------------------------------------------------------------|-------------------------------------------------------------------------------------|---------------------------------------------------------------------------------------|
| 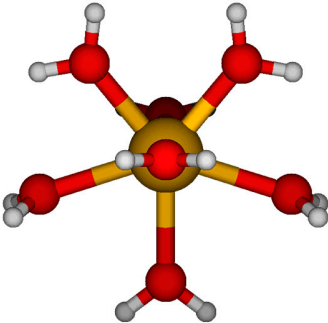   |    |    |
| $\text{Sb}(\text{H}_2\text{O})_7^{3+} \text{ } C_{2v} \text{ \#14}$                 | $\text{Sb}(\text{H}_2\text{O})_7^{3+} \text{ } C_{2v} \text{ \#15}$                 | $\text{Sb}(\text{H}_2\text{O})_7^{3+} \text{ } C_{2v} \text{ \#16}$                   |
|    |    |    |
| $\text{Sb}(\text{H}_2\text{O})_7^{3+} \text{ } C_2 \text{ \#5}$                     | $\text{Sb}(\text{H}_2\text{O})_7^{3+} \text{ } C_2 \text{ \#6}$                     | $\text{Sb}(\text{H}_2\text{O})_7^{3+} \text{ } C_2 \text{ \#11}$                      |
|  |  |  |
| $\text{Sb}(\text{H}_2\text{O})_7^{3+} \text{ } C_2 \text{ \#13}$                    | $\text{Sb}(\text{H}_2\text{O})_7^{3+} \text{ } C_2 \text{ \#16}$                    | $\text{Sb}(\text{H}_2\text{O})_7^{3+} \text{ } C_s \text{ \#2}$                       |
|  |  |  |
| $\text{Sb}(\text{H}_2\text{O})_7^{3+} \text{ } C_s \text{ \#4}$                     | $\text{Sb}(\text{H}_2\text{O})_7^{3+} \text{ } C_s \text{ \#5}$                     | $\text{Sb}(\text{H}_2\text{O})_7^{3+} \text{ } C_s \text{ \#6}$                       |

|                                                                                     |                                                                                     |                                                                                       |
|-------------------------------------------------------------------------------------|-------------------------------------------------------------------------------------|---------------------------------------------------------------------------------------|
| 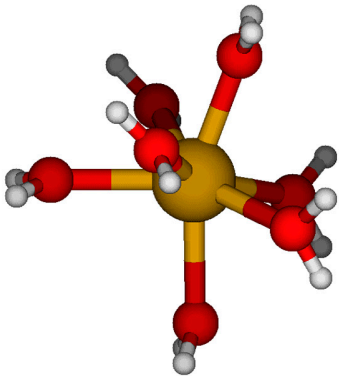   |    |    |
| $\text{Sb}(\text{H}_2\text{O})_7^{3+} \text{ } C_s \text{ \#7}$                     | $\text{Sb}(\text{H}_2\text{O})_7^{3+} \text{ } C_s \text{ \#8}$                     | $\text{Sb}(\text{H}_2\text{O})_7^{3+} \text{ } C_s \text{ \#10}$                      |
|   |   |   |
| $\text{Sb}(\text{H}_2\text{O})_7^{3+} \text{ } C_s \text{ \#13}$                    | $\text{Sb}(\text{H}_2\text{O})_7^{3+} \text{ } C_s \text{ \#14}$                    | $\text{Sb}(\text{H}_2\text{O})_7^{3+} \text{ } C_s \text{ \#17}$                      |
|  |  |  |
| $\text{Sb}(\text{H}_2\text{O})_7^{3+} \text{ } C_s \text{ \#20}$                    | $\text{Sb}(\text{H}_2\text{O})_7^{3+} \text{ } C_s \text{ \#21}$                    | $\text{Sb}(\text{H}_2\text{O})_7^{3+} \text{ } C_s \text{ \#22}$                      |
|  |  |  |
| $\text{Sb}(\text{H}_2\text{O})_7^{3+} \text{ } C_s \text{ \#23}$                    | $\text{Sb}(\text{H}_2\text{O})_7^{3+} \text{ } C_s \text{ \#24}$                    | $\text{Sb}(\text{H}_2\text{O})_7^{3+} \text{ } C_s \text{ \#26}$                      |

|                                                                                     |                                                                                     |                                                                                       |
|-------------------------------------------------------------------------------------|-------------------------------------------------------------------------------------|---------------------------------------------------------------------------------------|
| 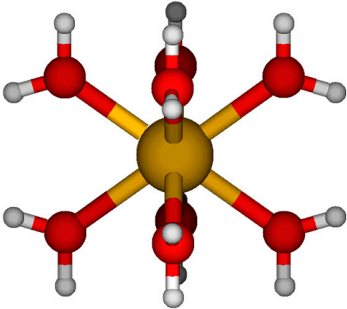   |    |    |
| $\text{Sb}(\text{H}_2\text{O})_8^{3+} D_{4h} \#1$                                   | $\text{Sb}(\text{H}_2\text{O})_8^{3+} D_{4h} \#2$                                   | $\text{Sb}(\text{H}_2\text{O})_8^{3+} D_{4d} \#1$                                     |
|    |    |    |
| $\text{Sb}(\text{H}_2\text{O})_8^{3+} D_{4d} \#2$                                   | $\text{Sb}(\text{H}_2\text{O})_8^{3+} S_8 \#1$                                      | $\text{Sb}(\text{H}_2\text{O})_8^{3+} D_4 \#1$                                        |
|  |  |  |
| $\text{Sb}(\text{H}_2\text{O})_8^{3+} C_{4h} \#1$                                   | $\text{Sb}(\text{H}_2\text{O})_8^{3+} C_{4v} \#1$                                   | $\text{Sb}(\text{H}_2\text{O})_8^{3+} C_{4v} \#2$                                     |
|  |  |  |
| $\text{Sb}(\text{H}_2\text{O})_8^{3+} C_{4v} \#4$                                   | $\text{Sb}(\text{H}_2\text{O})_8^{3+} D_{2d} \#1$                                   | $\text{Sb}(\text{H}_2\text{O})_8^{3+} D_{2d} \#2$                                     |



|                                                                                     |                                                                                     |                                                                                       |
|-------------------------------------------------------------------------------------|-------------------------------------------------------------------------------------|---------------------------------------------------------------------------------------|
| 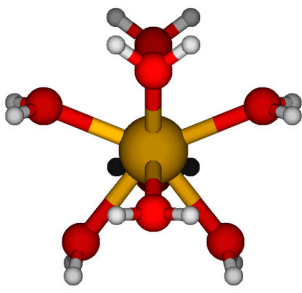   |    |    |
| $\text{Sb}(\text{H}_2\text{O})_8^{3+} D_{2d} \#4$                                   | $\text{Sb}(\text{H}_2\text{O})_8^{3+} D_{2d} \#5$                                   | $\text{Sb}(\text{H}_2\text{O})_8^{3+} D_2 \#1$                                        |
|    |    |                                                                                       |
| $\text{Sb}(\text{H}_2\text{O})_8^{3+} S_4 \#2$                                      | $\text{Sb}(\text{H}_2\text{O})_8^{3+} C_2 \#1$                                      |                                                                                       |
|  |  |  |
| $\text{Sb}(\text{H}_2\text{O})_9^{3+} D_{3h} \#1$                                   | $\text{Sb}(\text{H}_2\text{O})_9^{3+} D_{3h} \#2$                                   | $\text{Sb}(\text{H}_2\text{O})_9^{3+} D_{3h} \#3$                                     |
|  |  |  |
| $\text{Sb}(\text{H}_2\text{O})_9^{3+} D_{3h} \#4$                                   | $\text{Sb}(\text{H}_2\text{O})_9^{3+} D_3 \#1$                                      | $\text{Sb}(\text{H}_2\text{O})_9^{3+} C_{3h} \#1$                                     |

|                                                                                   |                                                                                   |                                                                                     |
|-----------------------------------------------------------------------------------|-----------------------------------------------------------------------------------|-------------------------------------------------------------------------------------|
| 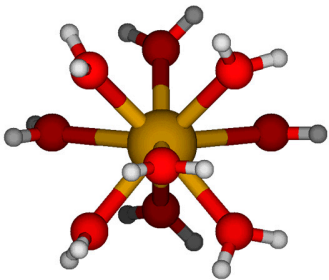 |  |  |
| $\text{Sb}(\text{H}_2\text{O})_9^{3+} \text{ } C_{3h} \text{ \#2}$                | $\text{Sb}(\text{H}_2\text{O})_9^{3+} \text{ } C_{3v} \text{ \#1}$                | $\text{Sb}(\text{H}_2\text{O})_9^{3+} \text{ } C_{3v} \text{ \#4}$                  |
|  |  |  |
| $\text{Sb}(\text{H}_2\text{O})_9^{3+} \text{ } C_{3v} \text{ \#2 [6+3]}$          | $\text{Sb}(\text{H}_2\text{O})_9^{3+} \text{ } C_{3v} \text{ \#3 [6+3]}$          | $\text{Sb}(\text{H}_2\text{O})_9^{3+} \text{ } D_3 \text{ \#1 [6+3]}$               |
